# Supplementary material for: Unveiling Etna volcano flank dynamics from new paleoseismological findings along the Fiandaca Fault
Source: Copernicus journal article supplement (doi:10.5194/egusphere-2024-4078), 2025-01-22
Supplement: Supplementary file 1 [file egusphere-2024-4078-supplement.pdf]

# **Unveiling Etna volcano flank dynamics from new paleoseismological findings along the Fiandaca Fault**

Giorgio Tringali<sup>1</sup>, Domenico Bella<sup>2</sup>, Franz Livio<sup>1</sup>, Anna Maria Blumetti<sup>3</sup>, Gianluca Groppelli<sup>4</sup>, Luca Guerrieri<sup>3</sup>, Marco Neri<sup>5</sup>, Vincenzo Adorno<sup>6</sup>, Rosario Pettinato<sup>2</sup>, Sara Trotta<sup>1</sup>, Alessandro M. Michetti<sup>1,7</sup>

<sup>1</sup>Dipartimento di Scienza e Alta Tecnologia, Università degli Studi dell'Insubria, Como, Italy

<sup>2</sup>Registered Geologist, Acireale, Italy

<sup>3</sup>Istituto Superiore per la Protezione e la Ricerca Ambientale (ISPRA), Roma, Italy

<sup>4</sup>Consiglio Nazionale delle Ricerche (CNR), Istituto di Geologia Ambientale e Geoingegneria (IGAG), Milano, Italy

<sup>5</sup>Istituto Nazionale di Geofisica e Vulcanologia (INGV), Osservatorio Etneo, Catania, Italy

<sup>6</sup>Registered Geologist, Zafferana Etnea, Italy

<sup>7</sup>Istituto Nazionale di Geofisica e Vulcanologia (INGV), Osservatorio Vesuviano, Napoli, Italy

## **Supplementary material**

- 1. Historical surface faulting events along the Fiandaca fault system**
- 2. Methods: sediment elemental composition**
- 3. Geological profiles along the Mt. Etna eastern flank faults**
- 4. Historical Etna flank eruptions from 500 BCE to 2018**

## 1. Historical surface faulting events along the Fiandaca fault system

**Table S1: Historical known earthquakes along the Mt. Etna E flank around the Fiandaca Fault with the corresponding fault activated, high uncertainties until the year 1831; SR: surface ruptures evidence; SRL: surface rupture length; the slip amount is referred as heave (h), throw (t) and dextral strike-slip (ss).**

| <i>d m y</i>    | <i>I<sub>MCS</sub></i> | <i>I<sub>EMS</sub></i> | <i>M<sub>w</sub></i> | <i>Epicentral location</i>               | <i>SR</i> | <i>SRL (km)</i> | <i>Faults</i>               | <i>Slip (cm)</i>            | <i>References</i>                                      |
|-----------------|------------------------|------------------------|----------------------|------------------------------------------|-----------|-----------------|-----------------------------|-----------------------------|--------------------------------------------------------|
| 28/06/1329      | 7-8                    |                        | -                    | E and S flank                            | yes       | -               | -                           | -                           | Nicolaus Specialis, 1791                               |
| 13/07/1766      | 4-5                    |                        | -                    | Acireale but highly felt in Zafferana E. | ?         | -               | -                           | -                           | Recupero, 1815                                         |
| 04/1809         | HF                     |                        | -                    | Acireale, NE and E flank                 | yes       | -               | -                           | -                           | Ferrara, 1810 and 1818                                 |
| 26/08/1819      | 4-5                    |                        | -                    | Acireale                                 | ?         | -               | -                           | -                           | Maravigna, 1819                                        |
| 28/08/1829      | F                      |                        | -                    | Surroundings of Acireale                 | ?         | -               | -                           | -                           | Alessi, 1829-1835                                      |
| 5 and 9/05/1831 | HF                     |                        | -                    | Acireale                                 | ?         | -               | -                           | -                           | Alessi, 1829-1835                                      |
| 07/01/1875      | -                      | 7                      | 3.8                  | Zerbate                                  |           | 1.5             | Fiandaca                    | -                           | De Rossi, 1875                                         |
| 08/08/1894      | -                      | 8-9                    | 4.6                  | Mazzasette-Fleri-Pennisi-Zerbate         | yes       | 7-8             | Fleri, Fiandaca, Aci Catena | at least 8-15 (t)           | Platania & Platania, 1894; Riccò, 1894; Platania, 1915 |
| 07/12/1907      | -                      | 7                      | 4.0                  | Fiandaca                                 | yes       | 2,5             | Fiandaca                    | at least 4 (h)              | Platania, 1908                                         |
| 07/05/1914      | -                      | 6                      | 3.2                  | Fiandaca                                 | yes       | 2               | Fiandaca                    | -                           | Platania, 1915                                         |
| 03/08/1931      | -                      | 6-7                    | 3.5                  | Fiandaca                                 | yes       | -               | Fiandaca                    | -                           | Cavasino, 1931; Imbò, 1935                             |
| 27/03/1941      | -                      | 6-7                    | 3.5                  | Fleri                                    | ?         | -               | Fleri                       | -                           | Ponte, 1941                                            |
| 19/06/1984      | -                      | 7                      | 3.96                 | Fiandaca                                 | yes       | 1.6             | Fiandaca                    | 2-3 (h)<br>20 (t)<br>1 (ss) | Benina et al., 1984; Patanè and Imposa, 1995           |
| 25/10/1984      | -                      | 8                      | 4.4                  | Fleri                                    | yes       | 1.7             | Fleri                       | -                           | Villari, 1984; Patanè and Imposa, 1995                 |
| 11/11/1997      | -                      | 5-6                    | 3.38                 | Santa Maria la Stella                    | yes       | 0.9             | Fiandaca                    | 1.5 (h)<br>0.3 (t)          | Azzaro, 1999; This study                               |
| 19/04/2005      | -                      | 5-6                    | 2.2                  | C.da Cubisia (Aci Catena)                | yes       | 1               | Fiandaca                    | 2-3 (h)                     | Azzaro et al., 2006                                    |

|            |   |     |     |                        |     |   |                             |                              |                                                                        |
|------------|---|-----|-----|------------------------|-----|---|-----------------------------|------------------------------|------------------------------------------------------------------------|
| 25/09/2014 | - | 5-6 | 3.3 | Santa Maria la Stella  | yes | 1 | Fiandaca                    | 1-2 (h)                      | Azzaro et al., 2020                                                    |
| 26/12/2018 | - | 8   | 4.9 | Fleri-Pennisi-Fiandaca | yes | 8 | Fleri, Fiandaca, Aci Catena | 120 (h)<br>45 (t)<br>30 (ss) | Azzaro et al., 2022;<br>Civico et al., 2019;<br>Tringali et al., 2023a |

**Table S2: Historical aseismic creep events occurred along the Aci Catena and Aci Platani faults; SRL: Surface Rupture Length.**

| <i>y</i>    | <i>d</i> | <i>m</i> | <i>Fault</i>      | <i>SRL (km)</i> | <i>Max Fault Slip (cm)</i> | <i>Reference</i>                   |
|-------------|----------|----------|-------------------|-----------------|----------------------------|------------------------------------|
| 1879        | 5        | Aug      | Aci Platani (PLA) | 4-6             | -                          | Silvestri, 1879                    |
| 1886        | 7        | Jun      | Aci Platani (PLA) | 1.5             | 5                          | Silvestri, 1893;<br>Platania, 1920 |
| 1899        | 31       | Mar      | Aci Platani (PLA) | -               | -                          | Platania, 1920;<br>Imbò, 1935      |
| early 1960s | -        | -        | Aci Catena (CAT)  | -               | -                          | Rasà et al., 1996                  |
| 1980        | -        | Aug      | Aci Catena (CAT)  | 1.5             | -                          | Rasà et al., 1996                  |
| 1984        | -        | Oct      | Aci Catena (CAT)  | 1.5             | -                          | Rasà et al., 1996                  |
| 1985        | -        | Apr      | Aci Catena (CAT)  | 1.5             | 10 (t) - 12 (h)            | Rasà et al., 1996                  |
| 2002        | -        | Oct-Dec  | Aci Catena (CAT)  | 0.6             | -                          | Tringali, 2023                     |
| 2018        | 26       | Dec      | Aci Platani (PLA) | 1.5             | 4 (h) - 1 (t)              | Tringali et al., 2023a             |
| 2018        | 26       | Dec      | Aci Catena (CAT)  | 0.6             | 1-2 (h)                    | Tringali et al., 2023a             |
| 2023        | -        | mid Apr  | Aci Catena (CAT)  | 2               | 3 (h)                      | Tringali, 2023                     |

## 2. Methods: sediment elemental composition

Sediment samples, named WFIA and EFIA, were collected from the East and West walls of the FIA1 trench in U2 using polyethylene bags, keeping them away from the light and temperature changes. Elemental chemistry composition was determined via highly sensitive analytical Inductively Coupled Plasma-Mass Spectrometry (ICP-MS) technique. Samples were previously dried at 40°C for 12 h and homogenized and pulverized in an agate mill. Subsequently, 250 mg of sample underwent microwave-assisted digestion (ETHOS One, Milestone MLS, USA) using aqua regia (EPA, Method 3051) and HF to dissolve the silica recalcitrant fraction (Pinna et al., 2022). Ultrapure nitric and hydrochloric acid solutions were obtained by sub-boiling distillation of Carlo Erba (Italy) reagents 65% volume solution, using Milestone (USA) duoPUR. The digested solutions were then diluted with ultrapure water (18.2 MΩcm resistivity) and analysed using Rh as internal standard. The results are reported in Table S3 as mg of the extracted element by a unit of volume (kg) of dry sediment.

**Table S3: Sediment chemical composition from samples collected in U2.**

|             | mg/kg     |           |             |             |              |            |             |             |           |            |              |           |           |           |           |           |           |            |           |           |           |           |            |           |
|-------------|-----------|-----------|-------------|-------------|--------------|------------|-------------|-------------|-----------|------------|--------------|-----------|-----------|-----------|-----------|-----------|-----------|------------|-----------|-----------|-----------|-----------|------------|-----------|
|             | Li        | Be        | Na          | Mg          | Al           | K          | Ca          | Ti          | Cr        | Mn         | Fe           | Ni        | Cu        | Zn        | As        | Se        | Rb        | Sr         | Zr        | Ag        | Cd        | Sn        | Ba         | Pb        |
| <b>WFIA</b> | 0,5<br>06 | 0,0<br>53 | 182,0<br>41 | 467,1<br>45 | 2240,<br>924 | 81,6<br>98 | 560,9<br>91 | 181,5<br>38 | 0,5<br>59 | 35,5<br>89 | 2138,<br>525 | 0,7<br>39 | 7,1<br>14 | 3,7<br>69 | 0,1<br>77 | 0,0<br>97 | 0,7<br>07 | 20,2<br>44 | 3,7<br>80 | 0,0<br>02 | 0,0<br>06 | 0,0<br>20 | 11,9<br>48 | 0,6<br>12 |
| <b>EFIA</b> | 0,4<br>97 | 0,0<br>53 | 185,5<br>03 | 442,5<br>01 | 2245,<br>885 | 79,4<br>94 | 574,0<br>49 | 164,6<br>53 | 0,5<br>39 | 31,0<br>78 | 2118,<br>228 | 0,5<br>43 | 8,6<br>04 | 3,0<br>41 | 0,1<br>51 | 0,0<br>97 | 0,6<br>54 | 20,7<br>47 | 4,2<br>38 | 0,0<br>02 | 0,0<br>04 | 0,0<br>21 | 12,3<br>14 | 0,5<br>13 |

The highlighted chemical composition shows similar values allowing to confirm that the collected samples are from the same horizon identified in the U2.

## 3. Geological profiles along the Mt. Etna eastern flank faults

We realized in total 22 geological cross sections numbered and distributed as follows:

- 1 to 13 along the Fiandaca fault, 1 to 6 crosscut the *sd* lava flow, 7 to 13 crosscut the 1329 lava flow (see location in Fig. S1a and S1b respectively).
- 14 to 17 crosscut the *at* lava flow along the Fiandaca, Aci Catena and Aci Platani faults (see location in Fig. S2a).
- 18 crosscut the Valverde formation along the Aci Platani Fault and 3 splays of the Aci Catena Fault (see location in Fig. S2b).
- 19 and 20 along the San Leonardello Fault crosscutting the *mi* and *mg* lava flow (see location in Fig. S3).
- 21 along the Santa Tecla Fault crosscutting the *ay* lava flow (see location in Fig. S3).
- 22 along the Trecastagni Fault crosscutting the *vg* lava flow (see location in Fig. S2).

The geological cross sections are showed in Figs. S4-11.

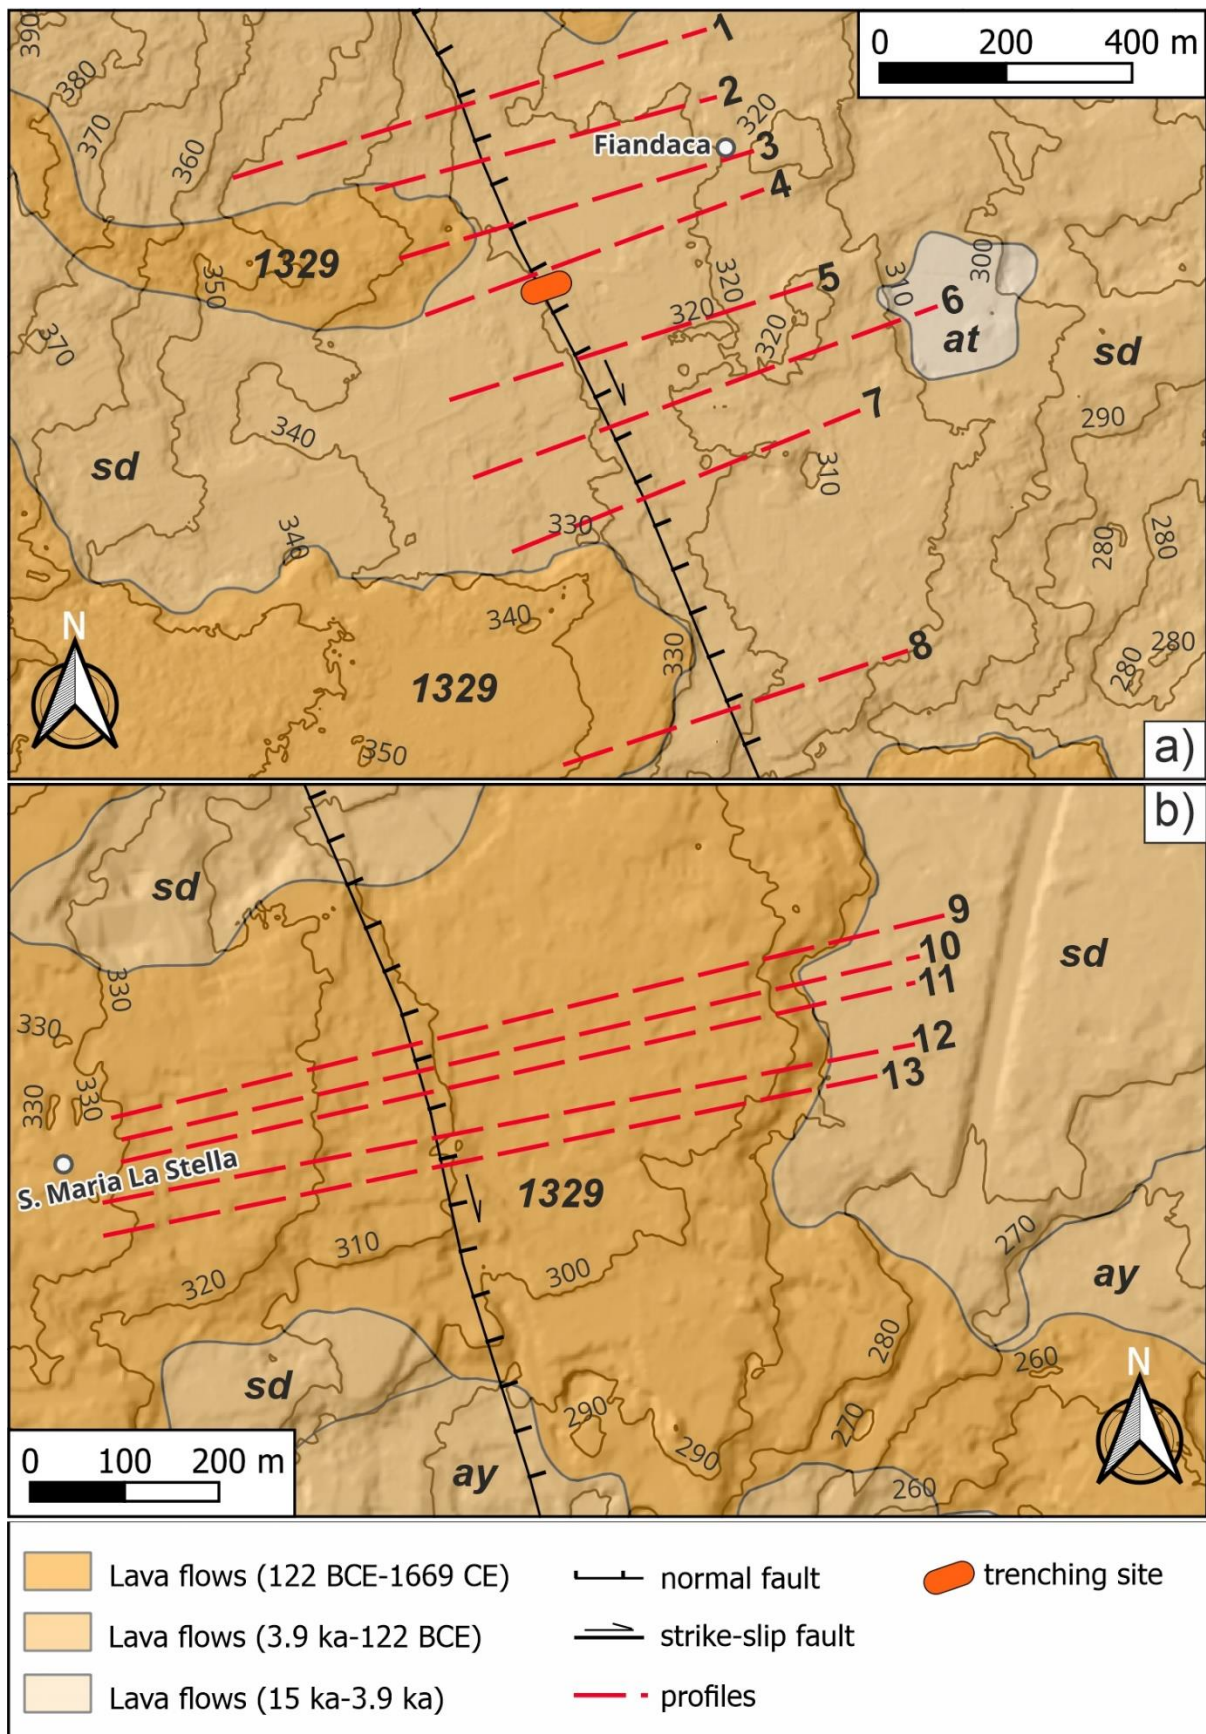

Figure S1: Geological maps with capable faults (modified after Branca et al., 2011; Azzaro et al., 2012; Barreca et al., 2013; ITHACA Working group, 2019) showing profiles along the Fiandaca Fault crossing: a) M. Salto del Cane lava flow (sd); b) 1329 lava flow. Other lava flows: Piano d'Api (ay); Aci Platani (at).

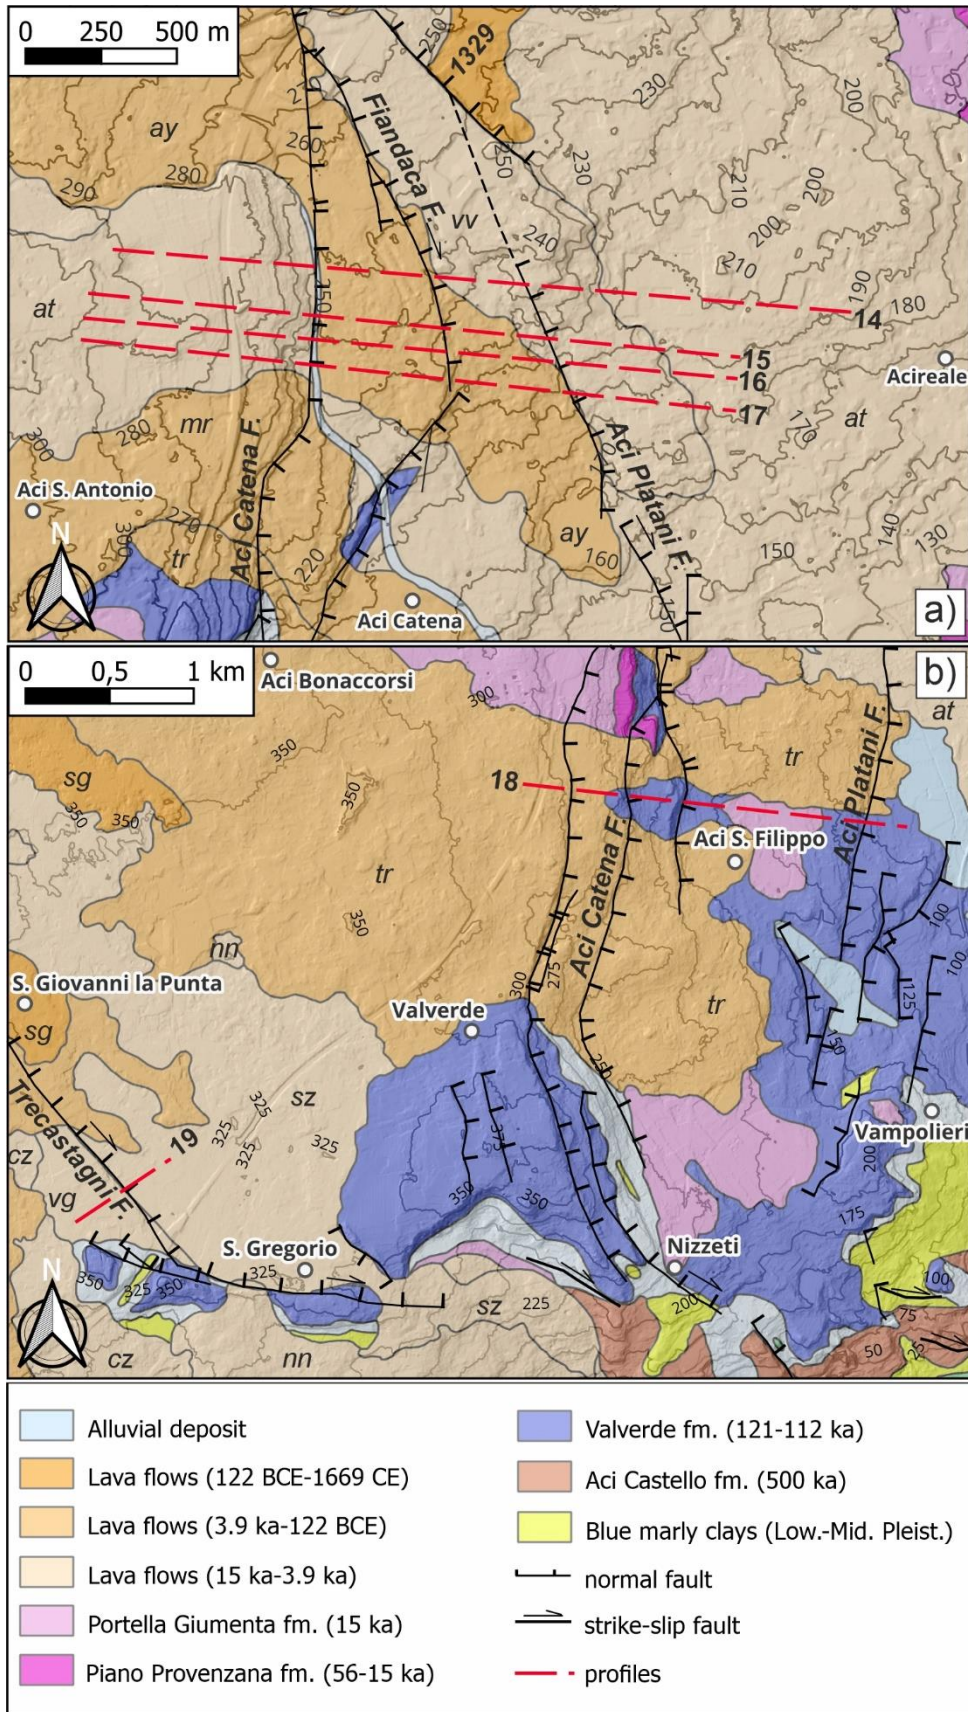

**Figure S2:** Geological maps with capable faults (modified after Branca et al., 2011; Azzaro et al., 2012; Barreca et al., 2013; ITHACA Working group, 2019) showing profiles along the Aci Catena, Aci Platani (a and b) and Trecastagni (b) faults crossing Mongibello lavas and Valverde formation. Lava flows: Aci Platani (at); Villa Vincenzina (vv); Vigna Grande (Vg); Cannizzaro (Nn); Cezza (Cz); San Gregorio (Sz); Piano d’Api (ay); Trecastagni (tr); M. Serra (mr).

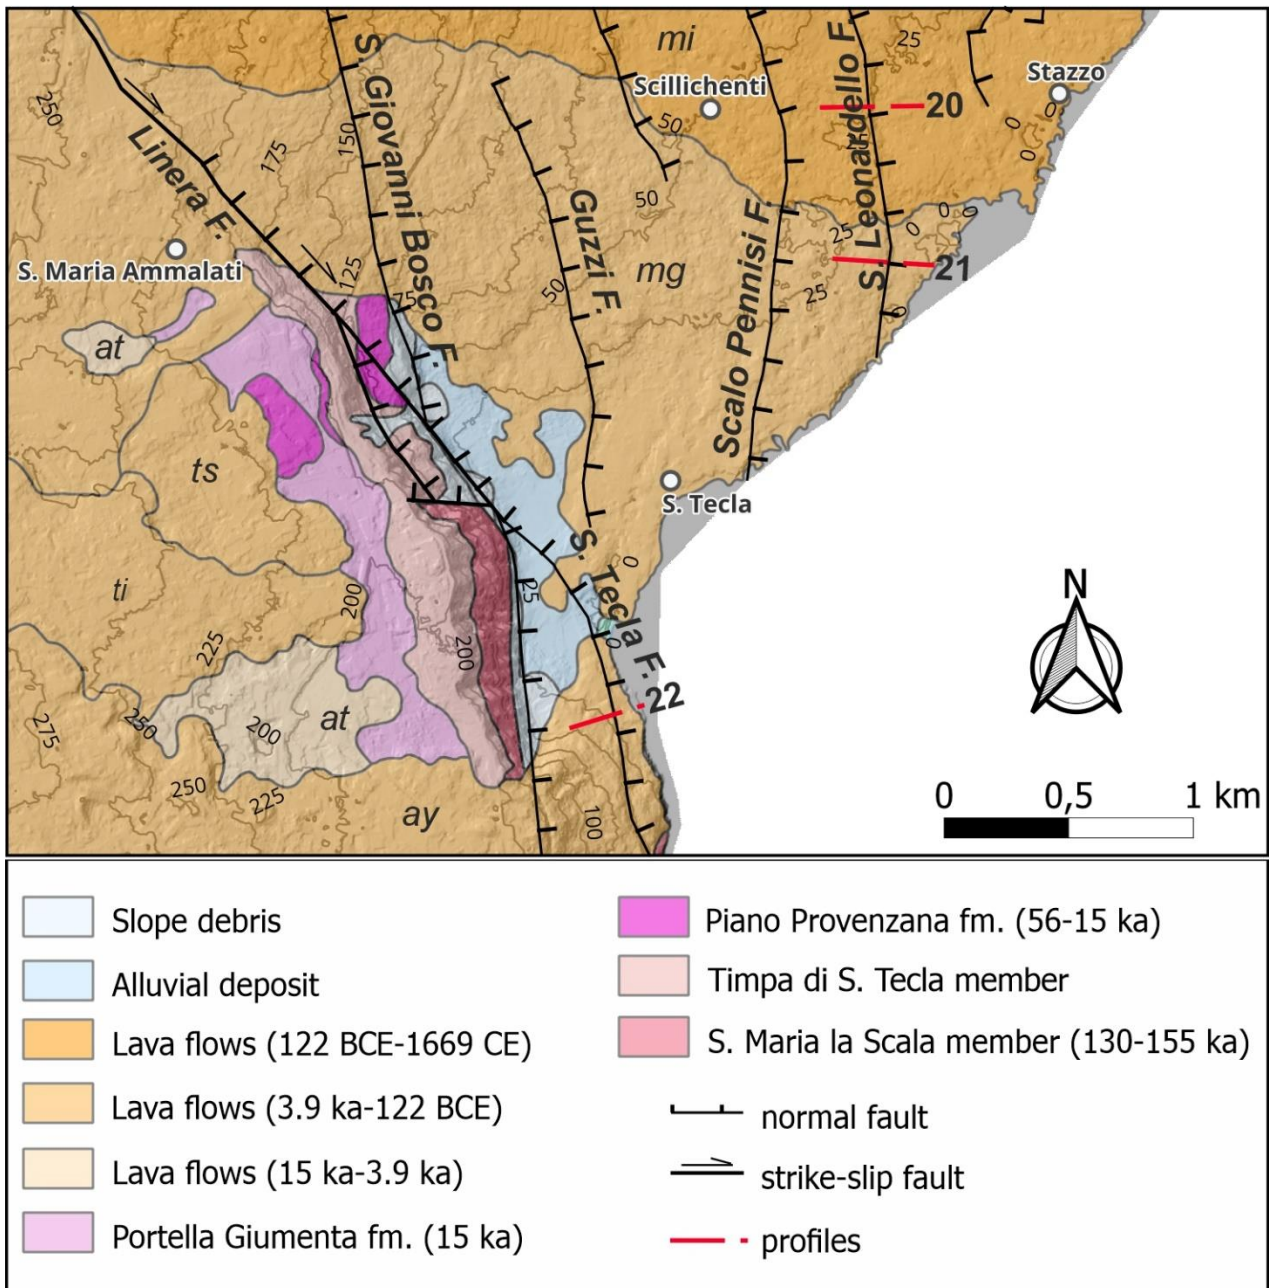

Figure S3: Geological map with capable faults (modified after Branca et al., 2011; Azzaro et al., 2012; Barreca et al., 2013; ITHACA Working group, 2019) showing profiles along the S. Leonardello and S. Tecla faults crossing the M. Illice (mi), M. Gorna (mg) and Piano d'Api (ay) lava flows. Other lava flows: Aci Platani (at); Castelluccio (ts); Timone (ti).

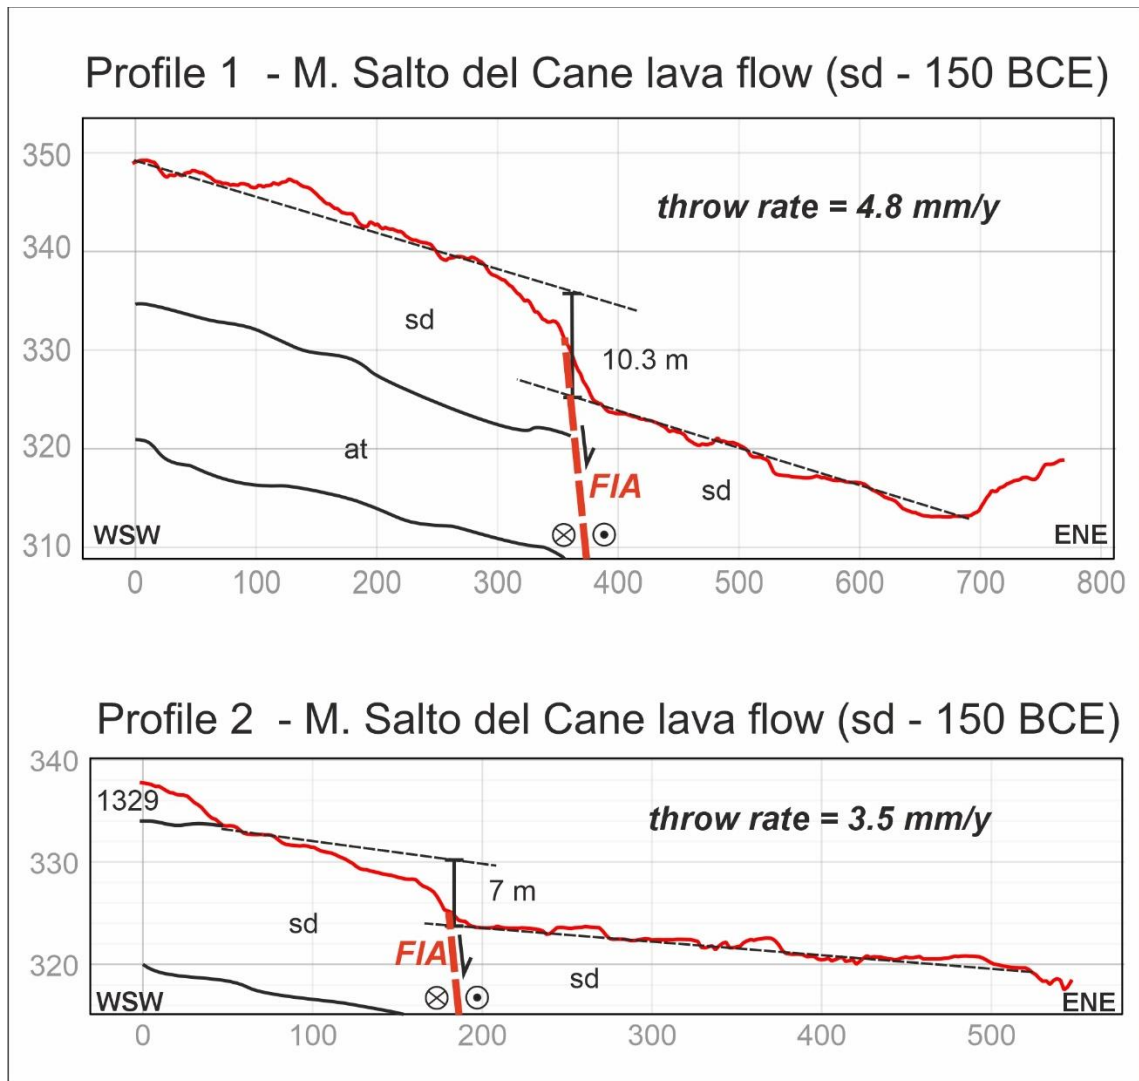

Figure S4: Geological profiles along the Fiandaca Fault (FIA); sd: M. Salto del Cane lava flow, at: Aci Platani lava flow.



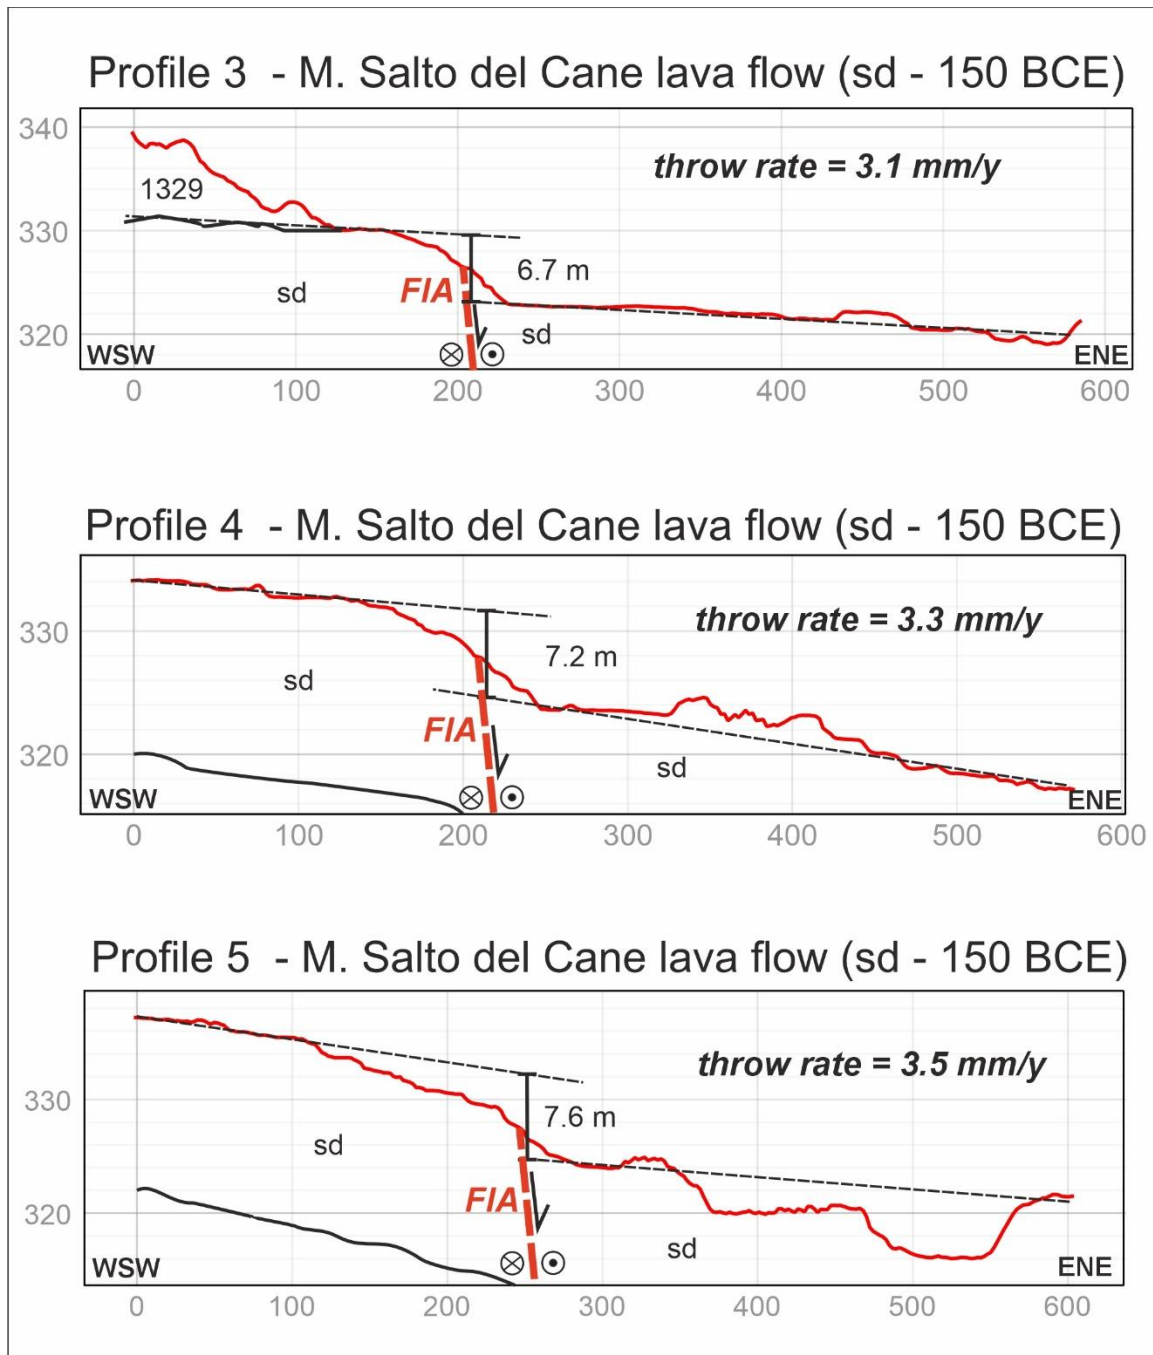

Figure S5: Geological profiles along the Fiandaca Fault (FIA); 1329: 1329 lava flow, sd: M. Salto del Cane lava flow.

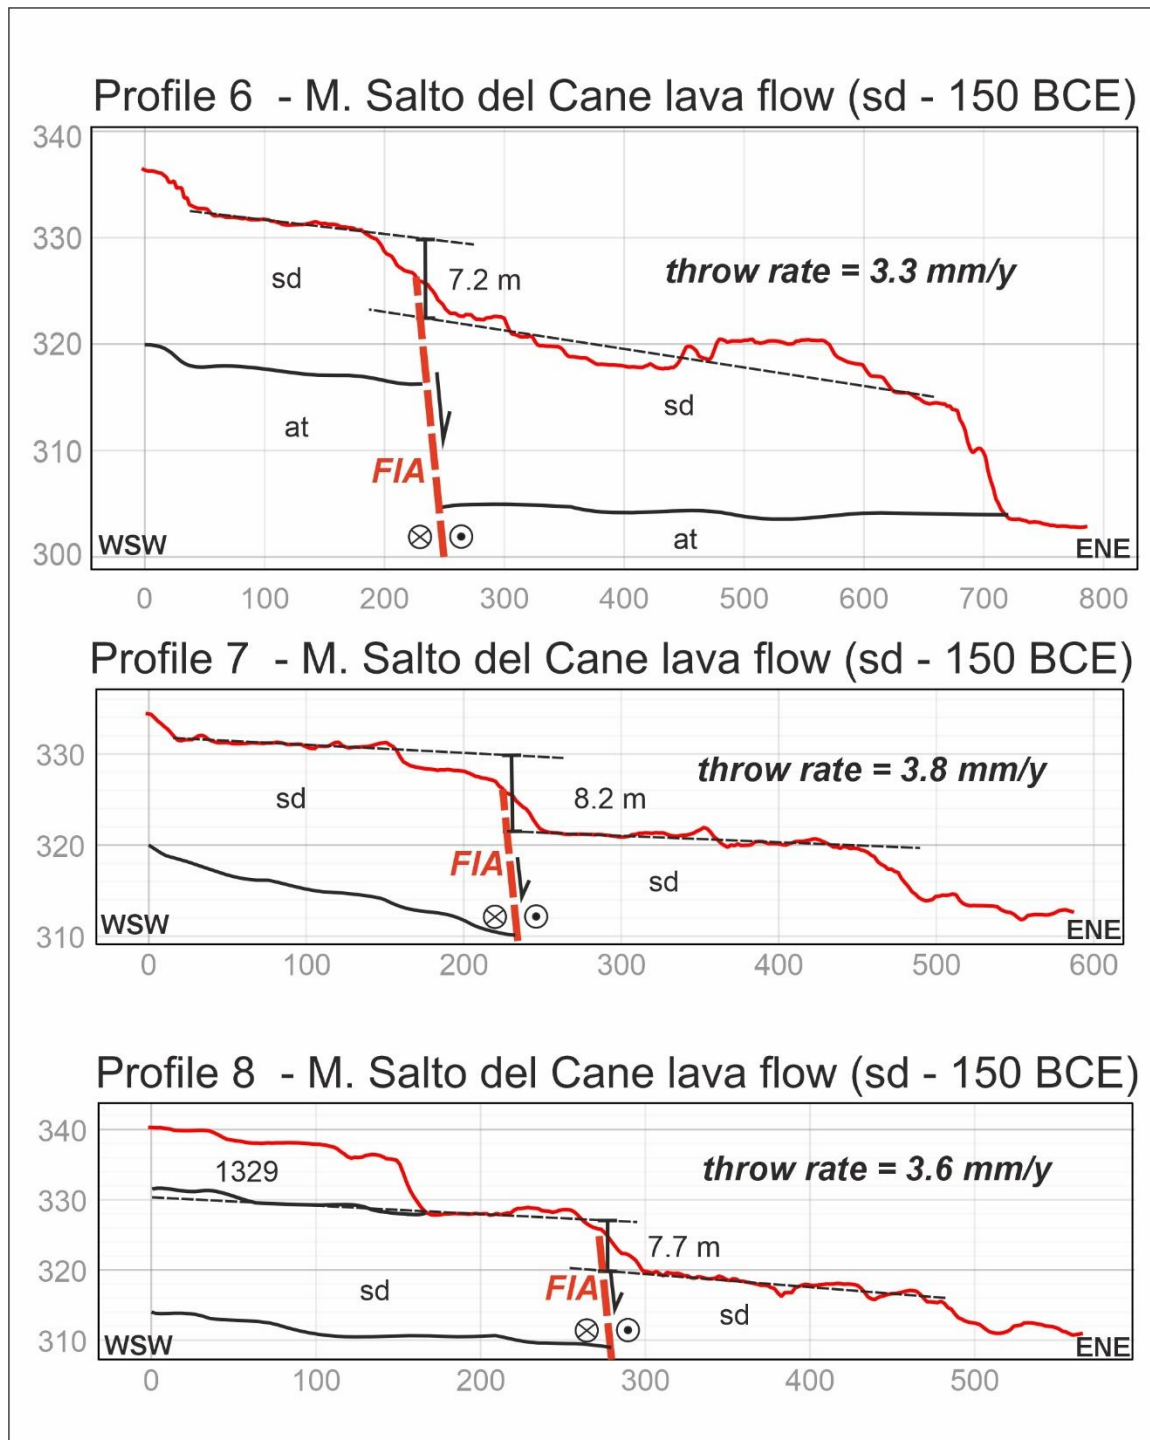

**Figure S6: Geological profiles along the Fiandaca Fault (FIA); 1329: 1329 lava flow, sd: M. Salto del Cane lava flow, at: Aci Platani lava flow.**

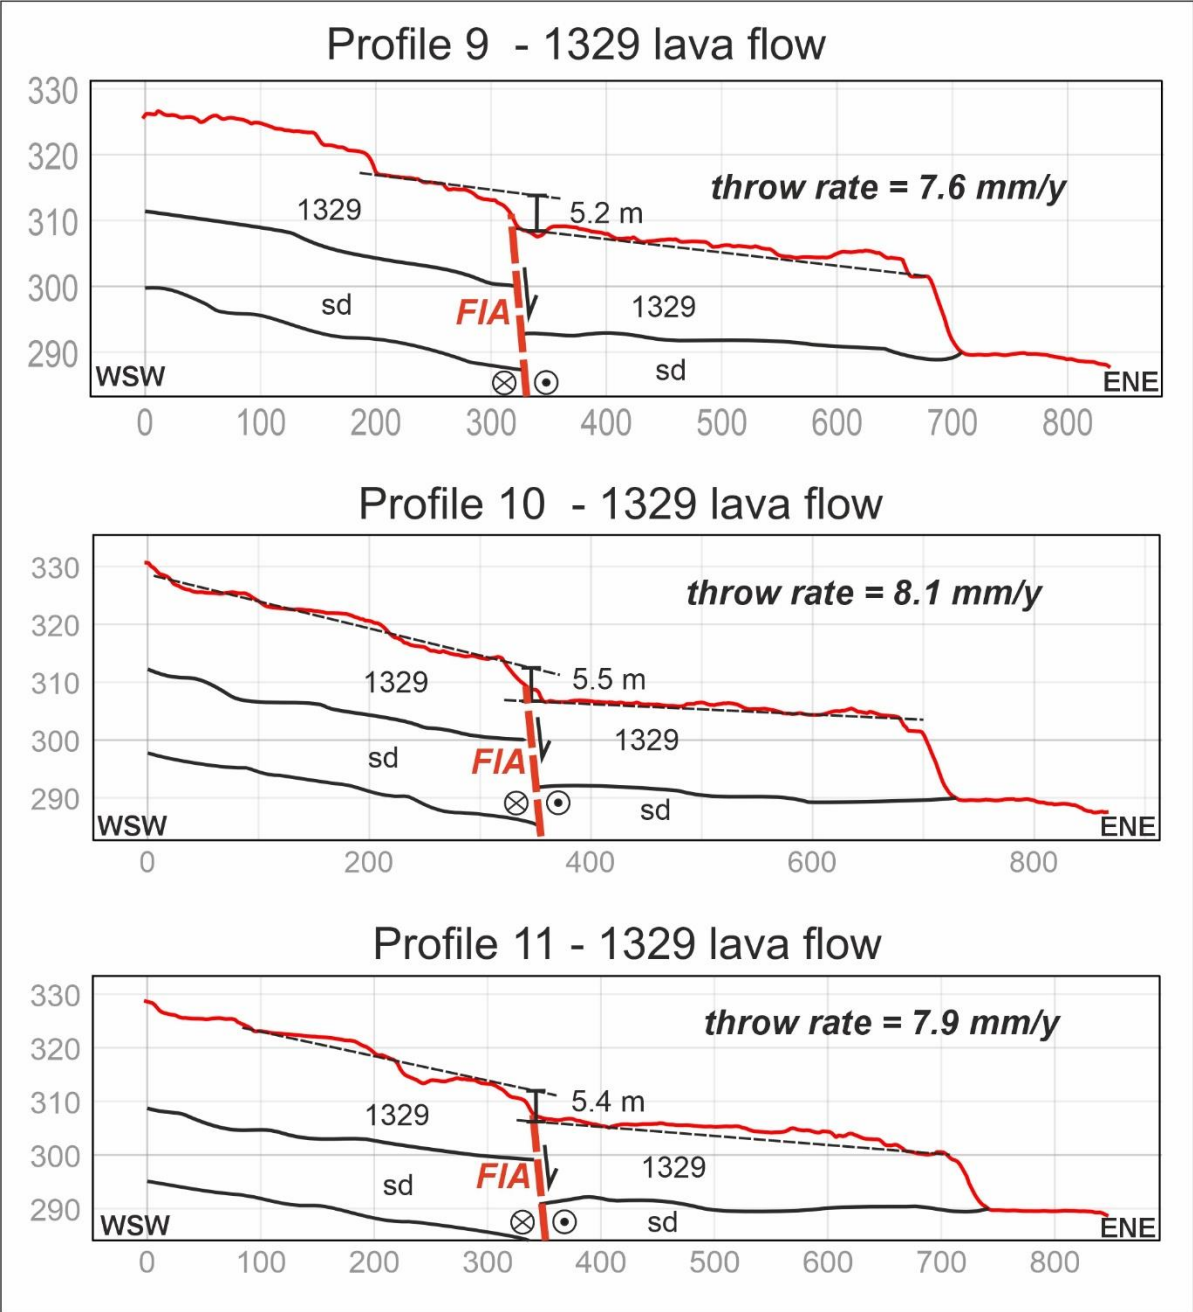

Figure S7: Geological profiles along the Fiandaca Fault (FIA); 1329: 1329 lava flow, sd: M. Salto del Cane lava flow.

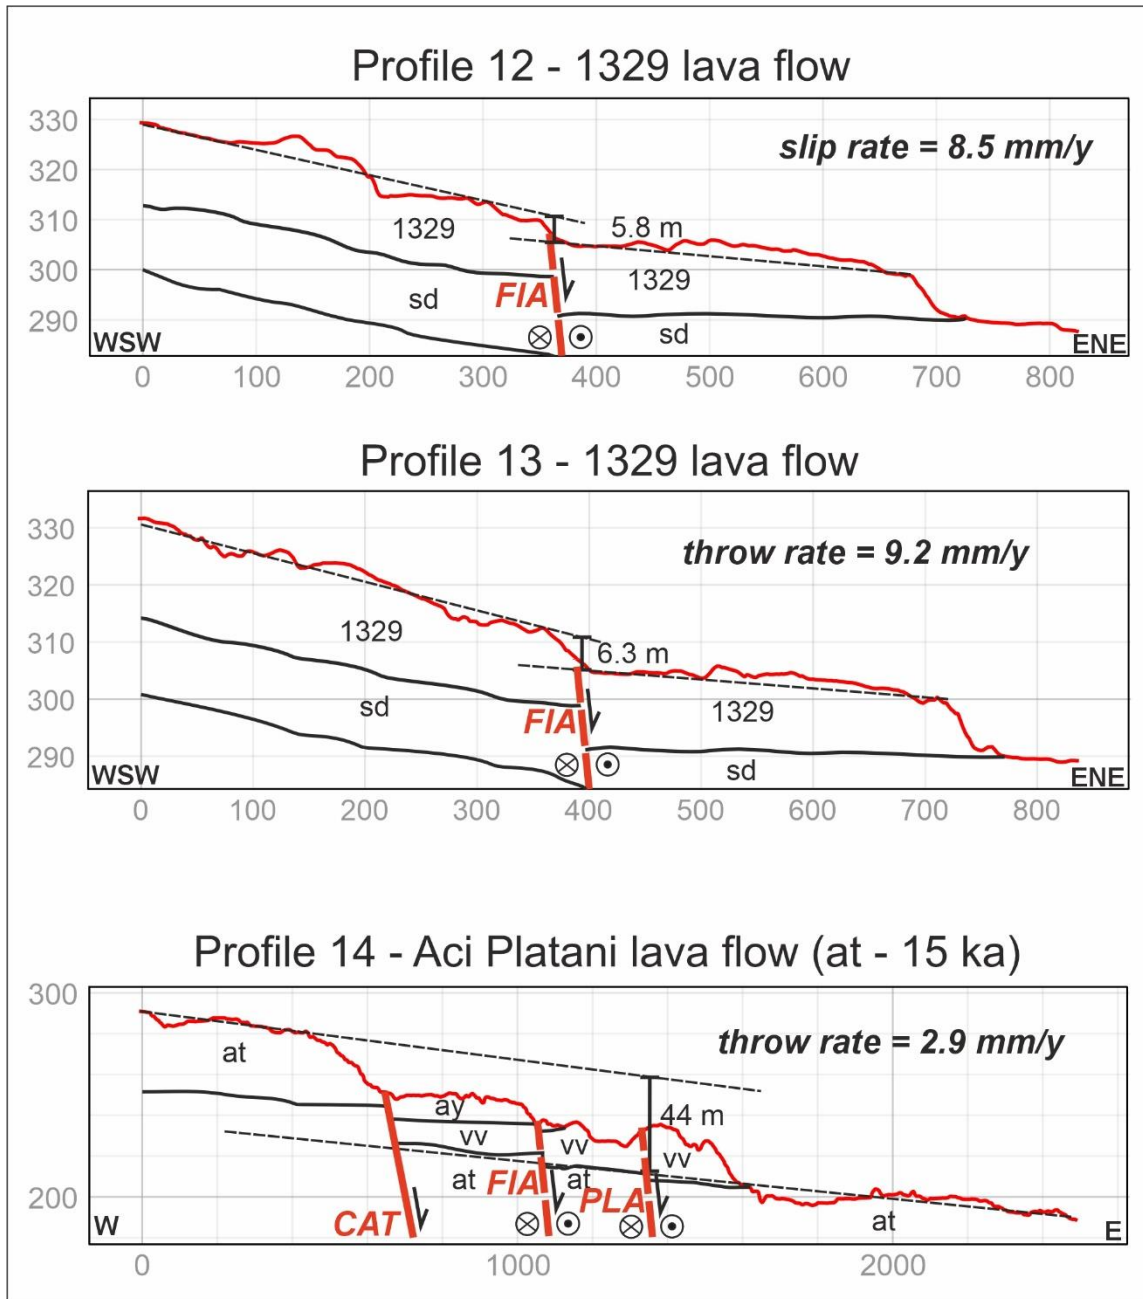

**Figure S8: Geological profiles along the Fiandaca (FIA), Aci Catena (CAT) and Aci Platani (PLA) Faults; 1329: 1329 lava flow, sd: M. Salto del Cane lava flow, ay: Piano d’Api lava flow, vv: Villa Vincenzina lava flow, at: Aci Platani lava flow.**

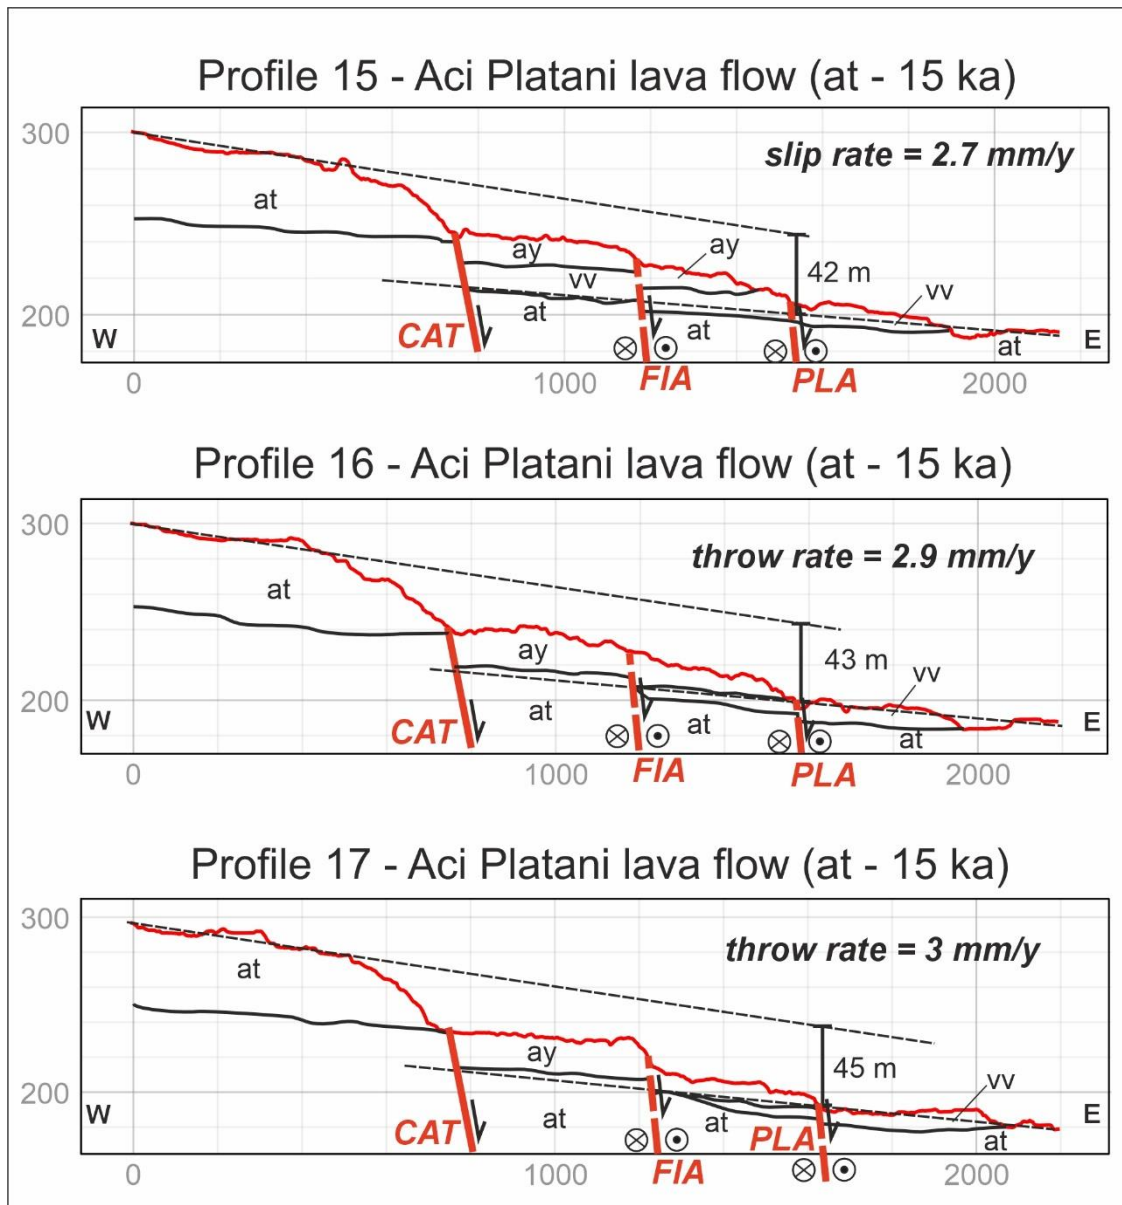

Figure S9: Geological profiles along the Fiandaca (FIA), Aci Catena (CAT) and Aci Platani (PLA) Faults; sd: M. Salto del Cane lava flow, ay: Piano d'Api lava flow, vv: Villa Vincenzina lava flow, at: Aci Platani lava flow.

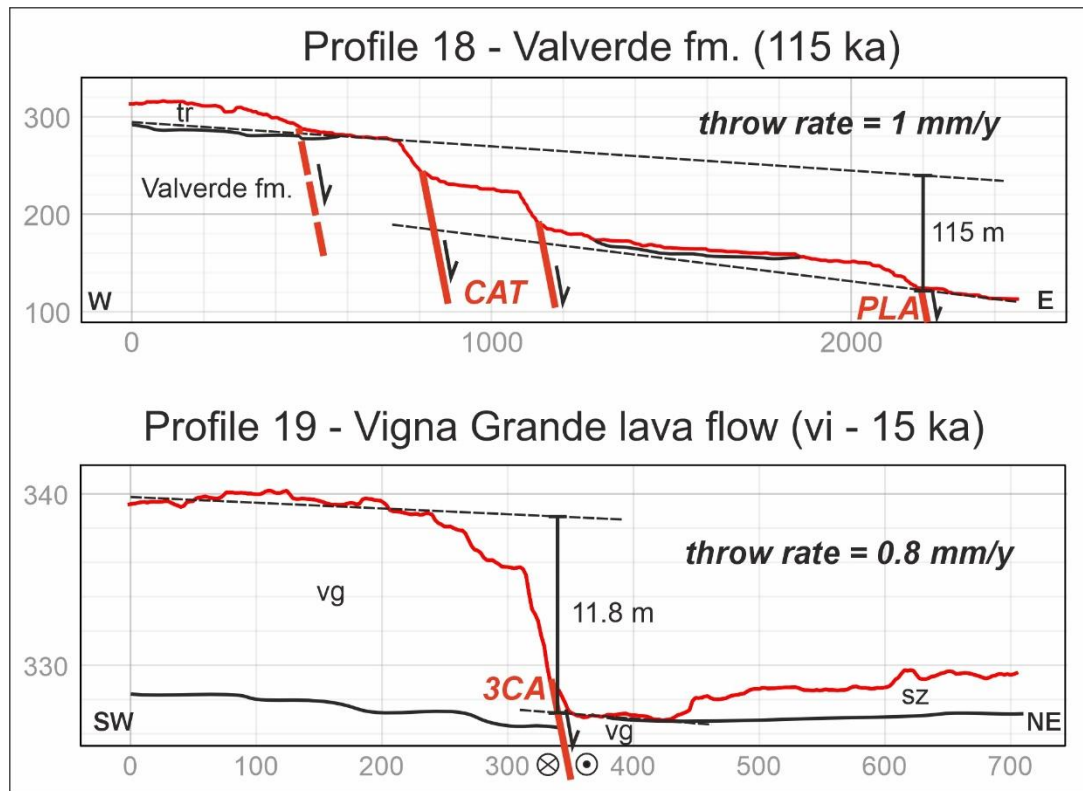

**Figure S10: Geological profiles along the Aci Catena (CAT) and Aci Platani (PLA) Faults; tr: Trecastagni lava flow, vg: Vigna Grande lava flow.**

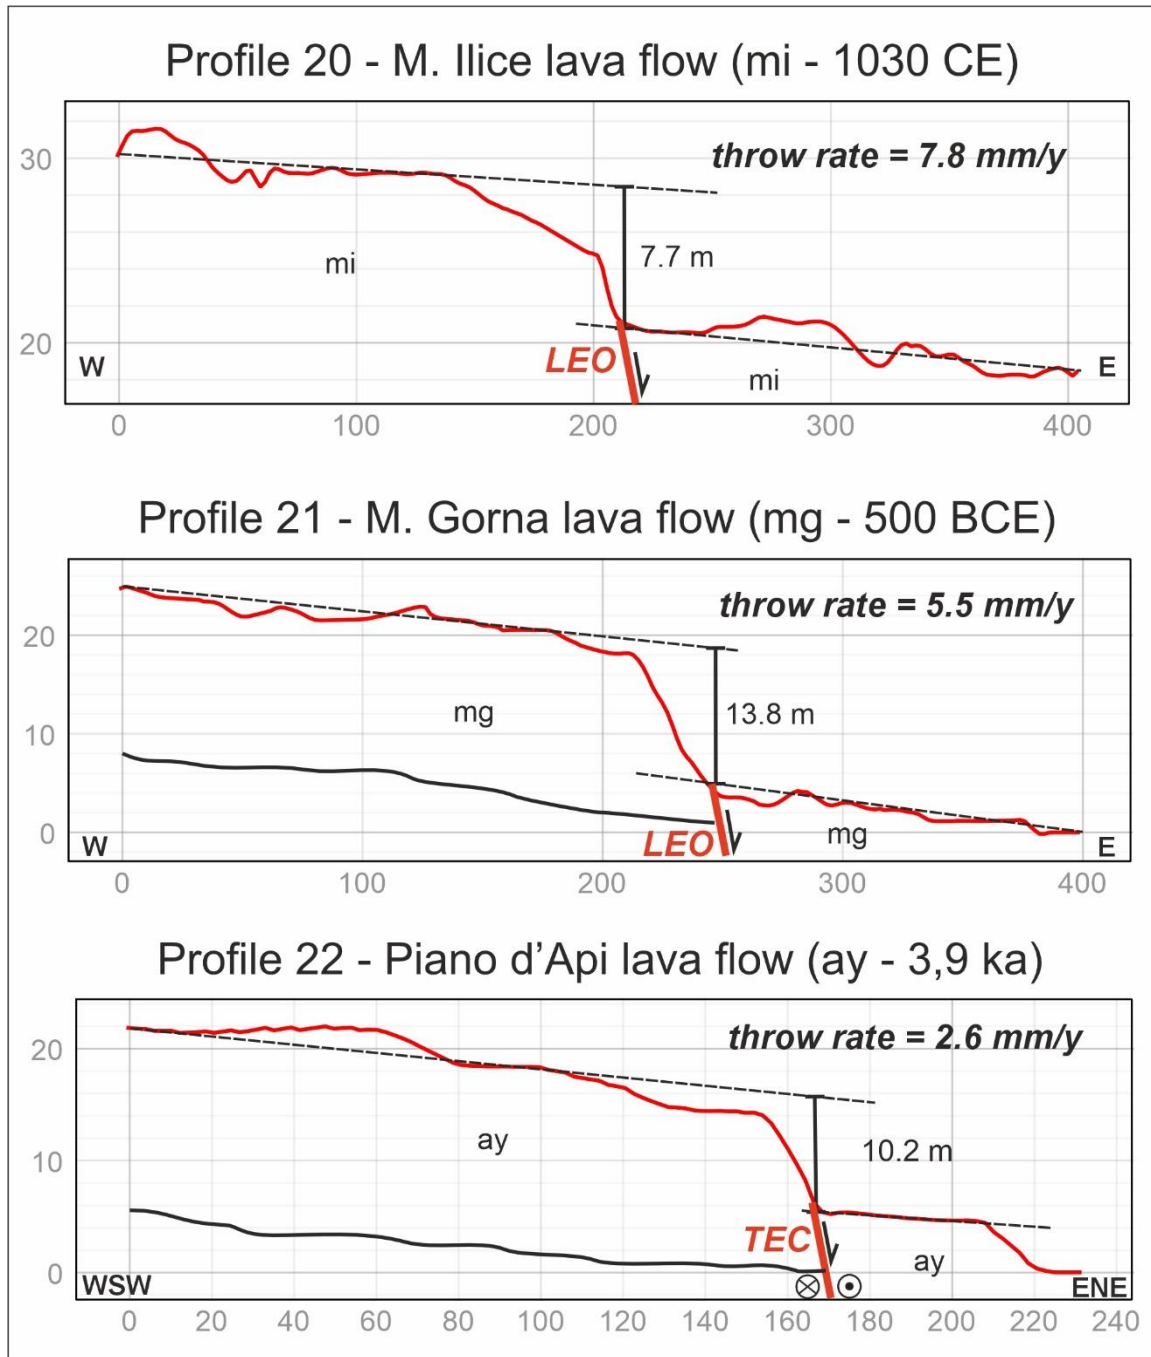

Figure S11: Geological profiles along the San Leonardello (LEO) and Santa Tecla (TEC) Faults; mi: M. Ilice lava flow, mg: M. Gorna lava flow, ay: Piano d'Api lava flow.

#### 4. Historical Etna flank eruptions from 500 BCE to 2018 CE

**Table S4: Historical flank eruptions from 500 BCE to 1600 CE (after Branca and Abate, 2019).**

| Time    | Experiment. dating | Vents and eruptive fissures |                                                |      |                  |                  |            |            | References           |
|---------|--------------------|-----------------------------|------------------------------------------------|------|------------------|------------------|------------|------------|----------------------|
|         |                    | Flank                       | Locality                                       | Rift | Alt. max (m asl) | Alt. min (m asl) | Strike (°) | Length (m) |                      |
| 396 BCE | ~500 BCE           | SE                          | M. Gorna                                       | S    | 700              |                  | 150        |            | Branca & Abate, 2019 |
| 420 BCE | 420 BCE +370 -320  | NW                          | Cardillo, eruptive fissures E of M. Spagnolo   | -    | 1450             |                  | 310        |            | Branca & Abate, 2019 |
| 240 BCE | 240 BCE +350 -310  | W                           | M. Ruvolo                                      | W    | 1350             |                  | 270        |            | Branca & Abate, 2019 |
| 135 BCE | 200 BCE ± 200      | S                           | Monpilieri                                     | S    | 600              | 550              | 180        |            | Branca & Abate, 2019 |
| 160 BCE | 160 BCE +190 -170  | W                           | M. Minardo                                     | W    | 1100             |                  | 250        |            | Branca & Abate, 2019 |
| 126 BCE | 150 BCE ± 200      | SE                          | M. Salto del Cane                              | S    | 1400             |                  | 180        |            | Branca & Abate, 2019 |
|         | 250 CE – 160 BCE   | W                           | Poggio la Caccia                               | W    | 1900             |                  | 270        |            | Branca & Abate, 2019 |
|         | 250 CE – 160 BCE   | W                           | Bocche Vituddi                                 | W    | 1000             |                  | 250        |            | Branca & Abate, 2019 |
|         | 250 CE – 160 BCE   | W                           | Vipera, eruptive fissures buried               | W    |                  |                  |            |            | Branca & Abate, 2019 |
|         | 250 CE – 160 BCE   | W                           | Cisterna, eruptive fissures buried             | W    |                  |                  |            |            | Branca & Abate, 2019 |
|         | 250 CE – 160 BCE   | W                           | Piano delle Ginestre, eruptive fissures buried | W    |                  |                  |            |            | Branca & Abate, 2019 |
|         | 250 CE – 160 BCE   | W                           | M. Rifugio Galvarina                           | W    | 1900             |                  | 260        |            | Branca & Abate, 2019 |
| 250 CE  | 250 ± 100          | W                           | Rif. M. Palestra                               | W    | 1950             |                  | 270        |            | Branca & Abate, 2019 |
| 252 CE  | 300 ± 100          | S                           | Monpeloso                                      | S    | 850              |                  | 180        |            | Branca & Abate, 2019 |
| 350 CE  | 350 ± 100          | W                           | Albero Bianco, eruptive fissures buried        | W    |                  |                  |            |            | Branca & Abate, 2019 |
| 350 CE  | 350 ± 50           | SE                          | S. Giovanni la Punta, eruptive fissures buried | S    |                  |                  |            |            | Branca & Abate, 2019 |
| 450 CE  | 450 ± 50           | W                           | Bronte, eruptive fissures buried               | W    |                  |                  |            |            | Branca & Abate, 2019 |
| 450 CE  | 450 ± 40           | SE                          | Piazza S. Alfio, eruptive fissures buried      | S    |                  |                  |            |            | Branca & Abate, 2019 |



|                   |         |           |         |                                                         |     |      |      |         |      |                      |
|-------------------|---------|-----------|---------|---------------------------------------------------------|-----|------|------|---------|------|----------------------|
| Early Middle Ages | 500 CE  | 500 ± 50  | S       | Fossa della Nave, eruptive fissures buried by 1983 lava | S   | 1700 | 1650 |         |      | Branca & Abate, 2019 |
|                   | 500 CE  | 500 ± 50  | NE      | Due Monti, eruptive fissures buried                     | ENE |      |      |         |      | Branca & Abate, 2019 |
|                   | 550 CE  | 550 ± 50  | SE      | M. Solfizio                                             | S   | 1800 |      |         |      | Branca & Abate, 2019 |
|                   | 700 CE  | 700 ± 80  | S       | Gallinara (Nicolosi), eruptive fissures buried          | S   |      |      |         |      | Branca & Abate, 2019 |
|                   | 700 CE  | 700 ± 50  | E, Vd B | Primoti (Zafferana N), eruptive fissures buried         | -   |      |      |         |      | Branca & Abate, 2019 |
|                   | 700 CE  | 700 ± 100 | NE      | Milicucco, eruptive fissures buried                     | ENE |      |      |         |      | Branca & Abate, 2019 |
|                   | 850 CE  | 850 ± 40  | SE      | Casa Scandurra, eruptive fissures buried                | S   |      |      |         |      | Branca & Abate, 2019 |
|                   | 950 CE  | 950 ± 30  | NW      | Murazzo Rotto (Alcantara)                               | -   | 1550 | 1450 | 350-360 |      | Branca & Abate, 2019 |
|                   | 950 CE  | 950 ± 50  | NW      | Serra del Monte, eruptive fissures buried               | -   |      |      |         |      | Branca & Abate, 2019 |
|                   | 1000 CE | 1000 ± 50 | NE      | M. Rinatu                                               | ENE | 1600 |      | 20-30   |      | Branca & Abate, 2019 |
|                   | 1000 CE | 1000 ± 50 | S       | M. Sona                                                 | S   | 1250 | 1170 | 200     |      | Branca & Abate, 2019 |
| Late Middle Ages  | 1020 CE | 1020 ± 40 | NE      | Scorciavacca, eruptive fissures buried by 1865 lava     | ENE | 900  | 850  |         |      | Branca & Abate, 2019 |
|                   | 1030 CE | 1030 ± 40 | SE      | M. Ilice, lave tra Pozzillo e Stazzo                    | S   | 700  |      | 160     |      | Branca & Abate, 2019 |
|                   | 1062 CE | 1060 ± 50 | W       | M. Gallo and M. Testa scoria cones                      | W   | 1600 | 1500 | 240     |      | Branca & Abate, 2019 |
|                   | 1120 CE | 1120 ± 30 | W       | Galvarina, eruptive fissures buried                     | W   |      |      |         |      | Branca & Abate, 2019 |
|                   | 1150 CE | 1150 ± 30 | W       | M. Arso ovest                                           | W   | 1450 |      |         |      | Branca & Abate, 2019 |
|                   | 1160 CE | 1160 ± 30 | S       | M.ti Arsi di S. Maria                                   | S   | 460  | 360  | 170     | 2200 | Branca & Abate, 2019 |
|                   | 1180 CE | 1180 ± 30 | NE      | Linguaglossa                                            | NE  | 1160 | 1380 |         |      | Branca & Abate, 2019 |
|                   | 1200 CE | 1200 ± 30 | W       | M. Forno                                                | W   | 1550 |      | 240     |      | Branca & Abate, 2019 |
|                   | 1250 CE | 1250 ± 20 | S       | Casa Costarelli                                         | S   | 1990 | 1910 | 170     |      | Branca & Abate, 2019 |

|  |         |                          |         |                                                                 |     |      |      |       |  |                      |
|--|---------|--------------------------|---------|-----------------------------------------------------------------|-----|------|------|-------|--|----------------------|
|  | 1250 CE | 1250 ± 20                | S       | M. Nero degli Zappini                                           | S   | 2000 | 1800 | 170   |  | Branca & Abate, 2019 |
|  | 1270 CE | 1270 ± 20                | SE      | Montarello                                                      | S   | 900  |      |       |  | Branca & Abate, 2019 |
|  | 1285 CE | February                 | E, Vd B | Lava toward the present Macchia                                 | ENE |      |      |       |  | Branca & Abate, 2019 |
|  | 1329 CE | 28 June–July?            | E, Vd B | Rocca Musarra                                                   | ENE |      |      |       |  | Branca & Abate, 2019 |
|  | 1329 CE | 28 June–July?            | SE      | Monterosso                                                      | S   |      |      |       |  | Branca & Abate, 2019 |
|  | 1350 CE | 1350 ± 50                | NW      | Rifugio M. Maletto, eruptive fissures buried                    | -   |      |      |       |  | Branca & Abate, 2019 |
|  | 1381 CE | 6 August-?               | S       | Lava flow to the N of Catania, buried                           | S   |      |      |       |  | Branca & Abate, 2019 |
|  | 1408 CE | 9–20 November            | SE      | Lava flow destroyed Pedara, eruptive fissures buried            | S   |      |      |       |  | Branca & Abate, 2019 |
|  | 1444 CE |                          | S       | Lava towards Catania, buried                                    | S   |      |      |       |  | Branca & Abate, 2019 |
|  | 1446 CE | 25 Sept.-?               | E, Vd B | Lava towards Zafferana, buried                                  | -   |      |      |       |  | Branca & Abate, 2019 |
|  | 1536    | 23 March- 10 or 15 April | S       | Lava towards Ragalna and Nicolosi                               | S   | 1550 | 1410 | 170   |  | Branca & Abate, 2019 |
|  | 1537    | 10–22 May                | S       | Lava destroyed Nicolosi, Mompilieri and Massa Annunziata        | S   | 1840 | 1780 |       |  | Branca & Abate, 2019 |
|  | 1566    | 1 Nov.-?                 | NE      | Eruptive fissures in Selletta Collabaxia, lava in Passopisciaro | NE  | 2000 | 1250 | 40-20 |  | Branca & Abate, 2019 |
|  | 1579    | 19 Sept.-?               | SE      | Lava towards Acireale, buried                                   | -   |      |      |       |  | Branca & Abate, 2019 |

**Table S5: Historical flank eruptions from 1600 to 2018 CE.**

| Time      | Locality                                                                            | Vents and eruptive fissures |      |                  |                   |             |            | Tot Volume (10 <sup>3</sup> m <sup>3</sup> ) | References                                 |
|-----------|-------------------------------------------------------------------------------------|-----------------------------|------|------------------|-------------------|-------------|------------|----------------------------------------------|--------------------------------------------|
|           |                                                                                     | Flank                       | Rift | Alt. max (m asl) | Alt.e min (m asl) | Strike (°)  | Lenght (m) |                                              |                                            |
| 1607-1608 |                                                                                     | NE                          | NE   | 2600             | -                 | -           | -          | 158                                          | Bencke et al., 2005; Branca & Abate, 2019  |
| 1610      | Grotta degli Archi                                                                  | SW                          | W    | 2500             | 2002              | 239         | 1245       | 30                                           | Bencke et al., 2005; Branca & Abate, 2019  |
| 1610      | Lava flow towards Adrano                                                            | SW                          | W    | 2275             | 1700              | 248-254     | 3000       | 91,7                                         | Bencke et al., 2005; Branca & Abate, 2019  |
| 1614-1624 | Sciara del follone, Monti Deserti, I due Pizzi, Grotta del Gelo, Grotta dei Lamponi | NE                          | NE   | 2400             | 2400              | 10-20       | 2400       | 1071                                         | Bencke et al., 2005; Branca & Abate, 2019  |
| 1634-1638 | Lava flow to the N of Fleri                                                         | S                           | S    | 2100             | 1950              | 157         | 1350       | 203                                          | Bencke et al., 2005; Branca & Abate, 2019  |
| 1643      | M. Pomiciaro                                                                        | NE                          | NE   | 2100             | 1275              | 15          | 4200       | 4,1                                          | Behncke et al., 2005; Branca & Abate, 2019 |
| 1646-1647 | M. Nero, M. Ponte di Ferro                                                          | NE                          | NE   | 2050             | 1800              | 41-48-58    | 1400       | 162,5                                        | Behncke et al., 2005; Branca & Abate, 2019 |
| 1651      | Valle del Bove                                                                      | E, VdB                      | ENE  | 1875             | 1815              | 77          | 540        | 22,7                                         | Behncke et al., 2005; Branca & Abate, 2019 |
| 1651-1653 | Lava in Bronte                                                                      | W                           | W    | 2600             | 1770              | 282         | 2190       | 474,8                                        | Behncke et al., 2005; Branca & Abate, 2019 |
| 1669      | M. Rossi, lava in Catania                                                           | S                           | S    | 950              | 625               | 152         | 4140       | 1247,5                                       | Behncke et al., 2005; Branca & Abate, 2019 |
| 1682      | Lava in Rocca Musarra                                                               | E, VdB                      | ENE  | -                | -                 | -           | -          | -                                            | Behncke et al., 2005; Branca & Abate, 2019 |
| 1689      | Eruptive fissures buried, lava toward Macchia                                       | E, VdB                      | ENE  | -                | -                 | -           | -          | -                                            | Behncke et al., 2005; Branca & Abate, 2019 |
| 1702      | Lava in Val Calanna                                                                 | E, VdB                      | -    | 2075             | 1875              | 123         | 950        | 16,9                                         | Behncke et al., 2005                       |
| 1755      | Eruptive fissures near Rocca Musarra, buried                                        | E, VdB                      | ENE  | 2000             | 1750              | -           | -          | 4,7                                          | Behncke et al., 2005                       |
| 1763      | M. Mezza Luna and M. Nuovo                                                          | W                           | W    | 1725             | 1580              | 268         | 1488       | 21,1                                         | Behncke et al., 2005                       |
| 1763      | La Montagnola                                                                       | S                           | S    | 2560             | 1925              | 253-195-184 | 2400       | 150                                          | Behncke et al., 2005                       |
| 1764-1765 | Lava covered by younger products                                                    | NE                          | NE   | 3125             | 2500              | 0-15        | 2670       | 117,2                                        | Behncke et al., 2005                       |

|           |                                                                                            |          |          |      |      |             |       |       |                                         |
|-----------|--------------------------------------------------------------------------------------------|----------|----------|------|------|-------------|-------|-------|-----------------------------------------|
| 1766      | M. Calcarazzi, Boccarelle di fuoco                                                         | S        | S        | 2075 | 1690 | 190-142     | 1907  | 137,3 | Behncke et al., 2005                    |
| 1780      | Spatter cones between M. Nero degli Zappini e M. Vetore                                    | S        | S        | 2360 | 1850 | 215         | 2216  | 29,3  | Behncke et al., 2005                    |
| 1792-1793 | Lava flows inside and outside VdB toward Zafferana, Grotta dei Tre livelli, Grotta Cassone | S        | S        | 2825 | 1500 | 155         | 3648  | 90,1  | Behncke et al., 2005                    |
| 1802      | Eruptive fissures near Rocca Musarra                                                       | E, VdB   | ENE      | 1950 | 1700 | 132         | 1198  | 10,4  | Behncke et al., 2005                    |
| 1809      | Bocche del 1809, lava towards Rovittello                                                   | NE       | NE       | 3000 | 1325 | 22-47-50    | 10200 | 38,2  | Behncke et al., 2005                    |
| 1811-1812 | M. Simone                                                                                  | E, VdB   | ENE      | 3000 | 1975 | 136-90      | 2454  | 54,3  | Behncke et al., 2005                    |
| 1819      | a "Padeddazza"                                                                             | E, VdB   | S        | 2850 | 2375 | 152         | 1702  | 47,9  | Behncke et al., 2005                    |
| 1832      | M. Nunziata, lava towards Bronte                                                           | W        | W        | 2900 | 2075 | 300-285-280 | 4000  | 60,7  | Behncke et al., 2005                    |
| 1843      | Bocche del 1843, lava south of Bronte, 59 killed by steam explosions at the lava front     | W        | W        | 2400 | 1900 | 287-281     | 1290  | 55,7  | Behncke et al., 2005                    |
| 1852-1853 | M. Centenari                                                                               | E, VdB   | -        | 1950 | 1700 | 102-98      | 1110  | 134   | Behncke et al., 2005                    |
| 1865      | M. Sartorius, lava south of Vena                                                           | NE       | ENE      | 1865 | 1690 | 70          | 1500  | 94,3  | Behncke et al., 2005                    |
| 1874      | Two small lava flows                                                                       | NE       | NE       | 2520 | 2110 | 32-25       | 3000  | 1,5   | Behncke et al., 2005                    |
| 1879      | Biradial eruption, M. Umberto e Margherita                                                 | N and SW | NE and S | 3000 | 1945 | 183-200-225 | 11500 | 41,9  | Behncke et al., 2005                    |
| 1883      | M. Leone                                                                                   | S        | S        | 1100 | 1050 | 208         | 765   | 0,2   | Behncke et al., 2005                    |
| 1886      | M. Gemmellaro, lava toward Nicolosi                                                        | S        | S        | 1525 | 1320 | 180-158     | 1010  | 42,5  | Behncke et al., 2005                    |
| 1892      | M. Silvestri, lava toward Nicolosi                                                         | S        | S        | 2045 | 1800 | 190-183     | 1245  | 130,6 | Behncke et al., 2005                    |
| 1908      | Bocche del 1908                                                                            | E, VdB   | S        | 2800 | 2275 | 170         | 4250  | 2,2   | Behncke et al., 2005; Neri et al., 2011 |
| 1910      | M. Riccò, lava toward Nicolosi, dry fissures between the Central Crater and La Montagnola  | S        | S        | 2900 | 1900 | 200         | 6189  | 65,2  | Behncke et al., 2005; Neri et al., 2011 |
| 1911      | Complex system of eruptive fissures, lava between Rovittello and Solicchiata               | NE       | NE       | 2550 | 1625 | 45          | 4710  | 57    | Behncke et al., 2005; Neri et al., 2011 |

|           |                                                                                                  |          |     |      |      |           |      |      |                                         |
|-----------|--------------------------------------------------------------------------------------------------|----------|-----|------|------|-----------|------|------|-----------------------------------------|
| 1918      | Small eruption with dry fissures on the upper S and N flank                                      | N        | -   | 3110 | 2025 | -         | 1779 | 1,2  | Behncke et al., 2005; Neri et al., 2011 |
| 1923      | M. Corbara, eruptive fissures partially overlapping the 1911, lava destroyed Catena              | NE       | NE  | 2500 | 1800 | 40        | 4276 | 78,5 | Behncke et al., 2005; Neri et al., 2011 |
| 1928      | Fissures along the Ripe della Naca, lava destroyed Mascali                                       | ENE      | ENE | 2700 | 1200 | 70        | 4885 | 42,5 | Behncke et al., 2005; Neri et al., 2011 |
| 1942      | Fissures to the W of M. Frumento Supino                                                          | S        | S   | 2800 | 2500 | 235       | 2098 | 1,8  | Behncke et al., 2005; Neri et al., 2011 |
| 1947      | Fissures between NE crater and M. Pizzillo, no appreciable seismicity                            | NE       | NE  | 3050 | 2200 | 30        | 5200 | 11,9 | Behncke et al., 2005; Neri et al., 2011 |
| 1949      | Biradial eruption, dry fissures crossing the CC and the NEC along the S Rift and the NW flank    | NW and S | S   | 3240 | 1990 | 165       | 3094 | 10,2 | Behncke et al., 2005; Neri et al., 2011 |
| 1950-1951 | M. Gaetano Platania, lava toward Milo and Zafferana                                              | E, VdB   | ENE | 2850 | 2200 | 80-90     | 6500 | 152  | Behncke et al., 2005; Neri et al., 2011 |
| 1956      | Lava from the CC and subterminal fissures in the upper VdB                                       | E, VdB   | S   | 3300 | 2700 | 130       | 156  | 3,1  | Behncke et al., 2005; Neri et al., 2011 |
| 1968      | Subterminal fissures                                                                             | E, VdB   | -   | 2600 | 2600 | -         | -    | 1    | Behncke et al., 2005; Neri et al., 2011 |
| 1971      | Fissures in the upper south flank, formation of SEC                                              | E, VdB   | S   | 3050 | 1800 | 40-80-170 | 6159 | 47,2 | Behncke et al., 2005; Neri et al., 2011 |
| 1971      | Fissures in Serra delle Concazze and VdB, M. Ponte, Grotta di Serracozzo, Lava north of Fornazzo | E, VdB   | ENE | 3050 | 1800 | 40-80-170 | 6159 | 47,2 | Behncke et al., 2005; Neri et al., 2011 |
| 1974      | M. De Fiore I, small lava                                                                        | W        | W   | 1670 | 1670 | 270       | 250  | 4,4  | Behncke et al., 2005; Neri et al., 2011 |
| 1974      | M. De Fiore II, small lava                                                                       | W        | W   | 1650 | 1650 | 285       | 250  | 3,2  | Behncke et al., 2005; Neri et al., 2011 |
| 1975      | Several Hornitos                                                                                 | NE       | NE  | 2625 | 2625 | 0         | 330  | 6    | Behncke et al., 2005; Neri et al., 2011 |
| 1975-1977 | M. Cumin                                                                                         | N        | NE  | 2980 | 2900 | 175       | 200  | 35,1 | Behncke et al., 2005; Neri et al., 2011 |

|           |                                                                                 |                   |           |      |      |             |      |      |                                         |
|-----------|---------------------------------------------------------------------------------|-------------------|-----------|------|------|-------------|------|------|-----------------------------------------|
| 1978      |                                                                                 | SEC,<br>E,<br>VdB | S         | 3000 | 2600 | 160         | 1863 | 27,5 | Behncke et al., 2005; Neri et al., 2011 |
| 1978      |                                                                                 | SEC,<br>E,<br>VdB | S         | 3050 | 2350 | -           | 1865 | 4    | Behncke et al., 2005; Neri et al., 2011 |
| 1978      |                                                                                 | SEC,<br>E,<br>VdB | S         | 3050 | 1675 | 110-150     | 2000 | 11   | Behncke et al., 2005; Neri et al., 2011 |
| 1979      | Complex fissures system                                                         | SEC,<br>E,<br>VdB | ENE       | 2950 | 1700 | -           | -    | 7,5  | Behncke et al., 2005; Neri et al., 2011 |
| 1981      | Lava toward Randazzo                                                            | NW                | -         | 2550 | 1140 | 325         | 8044 | 21,3 | Behncke et al., 2005; Neri et al., 2011 |
| 1983      |                                                                                 | S                 | S         | 2680 | 2250 | 200         | 2581 | 79   | Behncke et al., 2005; Neri et al., 2011 |
| 1985      | Piccolo Rifugio                                                                 | SEC, S            | S         | 3050 | 2480 | 200         | 1095 | 30   | Behncke et al., 2005; Neri et al., 2011 |
| 1985      | Eruption preceded by earthquakes and faulting along PER                         | E,<br>VdB         | -         | 2750 | 2420 | 105         | 1050 | 0,9  | Behncke et al., 2005; Neri et al., 2011 |
| 1986-1987 | M. Rittman, preceded by earthquakes and faulting along PER                      | SEC,<br>E,<br>VdB | ENE       | 3050 | 2180 | 75          | 2575 | 60   | Behncke et al., 2005; Neri et al., 2011 |
| 1989      | Dry fractures system from the SEC to Piano del Vescovo (6,3 km)                 | SEC,<br>E,<br>VdB | ENE       | 2610 | 2550 | 35          | 2100 | 26,2 | Behncke et al., 2005; Neri et al., 2011 |
| 1991-1993 | Fissures similar to 1989, lava toward Zafferana Etnea                           | SEC,<br>E,<br>VdB | S         | 3100 | 2400 | 165         | 2867 | 235  | Behncke et al., 2005; Neri et al., 2011 |
| 2001      | Valle del Leone, lateral of 2001                                                | SEC,<br>E,<br>VdB | S and ENE | 3100 | 2600 | 40-70-170   | 4700 | 6,5  | Behncke et al., 2005; Neri et al., 2011 |
| 2001      | Piano del Lago crater, eccentric part of 2001, lava in Rifugio Sapienza area    | S                 | S         | 2570 | 2100 | 170-180-210 | 2100 | 26,6 | Behncke et al., 2005; Neri et al., 2011 |
| 2002      | Desruption of Piano Provenzana area, lateral part of 2002-2003                  | NE                | NE        | 3010 | 1890 | 20-65       | 2600 | 11   | Behncke et al., 2005; Neri et al., 2011 |
| 2002-2003 | Two large cones, lava toward Rifugio Sapienza area, eccentric part of 2002-2003 | S                 | S         | 2850 | 2600 | 0           | 900  | 74,5 | Behncke et al., 2005; Neri et al., 2011 |
| 2004-2005 | Eruption without seismic and explosive activity                                 | E,<br>VdB         | -         | 3000 | 2320 | 125         | 1600 | 40   | Behncke et al., 2005; Neri et al., 2011 |

|           |                                                                   |        |   |      |      |         |      |      |                                                                  |
|-----------|-------------------------------------------------------------------|--------|---|------|------|---------|------|------|------------------------------------------------------------------|
| 2008-2009 | Eruption inside VdB                                               | E, VdB | - | 3050 | 2620 | 121-138 | 1255 | 74,1 | Bonaccorso et al., 2011; Neri et al., 2011; Behncke et al., 2016 |
| 2018      | SEC, eruptive fissures propagated from the base of SEC toward VdB | E, VdB | S | 3000 | 2400 | 170-120 | 800  | 2,75 | De Novellis et al., 2019; Calvari et al., 2020                   |

## References

- Alessi, G., (1829-1835). Storia critica delle eruzioni dell'Etna. *Atti Accademia Gioenia di Scienze Naturali di Catania, ser. 1, vol. 3, pp. 17-75; vol. 4, pp. 23-75; vol. 5, pp. 43-72; vol. 6, pp. 85-116; vol. 7, pp. 21-66; vol. 8, pp. 99-149; vol. 9, pp. 121-206, Catania.*
- Azzaro, R., (1999). Earthquake surface faulting at Mount Etna volcano (Sicily) and implications for active tectonics. *Journal of Geodynamics* 28, 193–213. [https://doi.org/10.1016/S0264-3707\(98\)00037-4](https://doi.org/10.1016/S0264-3707(98)00037-4)
- Azzaro, R., D'Amico, S., Mostaccio, A., Scarfi, L., Tuvè, T., (2006). Terremoti con effetti macrosismici in Sicilia orientale nel periodo Gennaio 2002 – Dicembre 2005. *Quaderni di geofisica*, 41, 41-42.
- Azzaro, R., D'Amico, S., Tuvè, T., Mostaccio, A., & Scarfi, L., (2020). Terremoti con effetti macrosismici in Sicilia nel periodo gennaio 2014 dicembre 2018. *Quad. Geofis.*, 160: 1-62. <https://doi.org/10.13127/qdg/160>
- Azzaro, R., Pucci, S., Villani, F., Civico, R., Branca, S., Cantarero, M., et al. (2022). Surface faulting of the 26 December 2018, Mw5 earthquake at Mt. Etna volcano (Italy): Geological source model and implications for the seismic potential of the Fiandaca fault. *Tectonics*, 41, e2021TC007182. <https://doi.org/10.1029/2021TC007182>
- Barreca, G., Bonforte, A., & Neri, M. (2013). A pilot GIS database of active faults of Mt. Etna (Sicily): A tool for integrated hazard evaluation. *Journal of Volcanology and Geothermal Research*, 251, 170-186. <https://doi.org/10.1016/j.jvolgeores.2012.08.013>
- Benina, A., Imposa, S., Gresta, S. & Patanè, G., (1984). Studio macrosismico e strumentale di due terremoti tettonici avvenuti sul versante meridionale dell'Etna. *Proc. 3th Conv. GNGTS, CNR, Rome (1984)*, 3, 934-940.
- Behncke, B., Neri, M., & Nagay, A. (2005). Lava flow hazard at Mount Etna (Italy): new data from a GIS-based study. *Special Papers-Geological Society Of America*, 396, 189. <https://doi.org/10.1130/0-8137-2396-5.189>
- Bonaccorso, A., Bonforte, A., Calvari, S., Del Negro, C., Di Grazia, G., Ganci, G., Neri, M., Vicari, A., Boschi, E. (2011). The initial phases of the 2008–2009 Mount Etna eruption: A multidisciplinary approach for hazard assessment. *Journal of Geophysical Research: Solid Earth*, 116(B3). <https://doi.org/10.1029/2010JB007906>
- Branca, S., & Abate, T. (2019). Current knowledge of Etna's flank eruptions (Italy) occurring over the past 2500 years. From the iconographies of the XVII century to modern geological cartography. *Journal of Volcanology and Geothermal Research*, 385, 159-178. <https://doi.org/10.1016/j.jvolgeores.2017.11.004>
- Branca, S., Coltelli, M., Groppelli, G., & Lentini, F. (2011). Geological map of Etna volcano, 1: 50,000 scale. *Italian Journal of Geosciences*, 130(3), 265-291. <https://doi.org/10.3301/IJG.2011.15>
- Calvari, S., Cannavò, F., Bonaccorso, A., Spampinato, L., & Pellegrino, A. G. (2018). Paroxysmal explosions, lava fountains and ash plumes at Etna Volcano: Eruptive processes and hazard implications. *Frontiers in Earth Science*, 6, 107. <https://doi.org/10.3390/rs12060905>
- Cavasino, A., (1935). I terremoti d'Italia nel trentacinquennio 1899-1933. *Mem. R. Uff. C. Meteor. E Geof.* 6 (III), 266.

- Civico, R., Pucci, S., Nappi, R., Azzaro, R., Villani, F., Pantosti, D. et al. (2019). Surface ruptures following the 26 December 2018, Mw 4.9, Mt. Etna earthquake, Sicily (Italy). EMERGEO Working Group (Etna 2018). *Journal of Maps*, 15(2), 831-837. <https://doi.org/10.1080/17445647.2019.1683476>
- De Novellis, V., Atzori, S., De Luca, C., Manzo, M., Valerio, E., Bonano, M. et al. (2019). DInSAR analysis and analytical modeling of Mount Etna displacements: The December 2018 volcano-tectonic crisis. *Geophysical Research Letters*, 46(11), 5817-5827. <https://doi.org/10.1029/2019GL082467>
- De Rossi M.S., (1875). Terremoti presso l'Etna e conati eruttivi del medesimo vulcano, dal 7 al 20 Gennaio. *Bull. Vulc. It.*, 19-21.
- Ferrara, F., (1810). I Campi Flegrei della Sicilia e delle isole che le sono intorno o descrizione fisica e mineralogica di queste isole. *Messina*, 424 pp.
- Ferrara, F., (1818). Descrizione dell'Etna, con la storia delle eruzioni e il catalogo dei prodotti. *Palermo, L. Dato*, 256 pp.
- Imbò, G., (1935). I terremoti Etnai. *Pubblicazione della Commissione Italiana per lo Studio delle Grandi Calamità, Regia Accademia Nazionale dei Lincei, Roma*, 5, parte 1.
- ITHACA Working Group: ITHACA (ITaly HAZard from CApable faulting), A database of active capable faults of the Italian territory, Version December 2019; ISPRA Geological Survey of Italy. Web Portal <http://sgi2.isprambiente.it/ithacaweb/Mappatura.aspx>, 2019.
- Maravigna, C., (1819). Istoria dell'incendio dell'Etna del mese di maggio 1819. *Catania*, 102 pp.
- Neri, M., Acocella, V., Behncke, B., Giammanco, S., Mazzarini, F., & Rust, D. (2011). Structural analysis of the eruptive fissures at Mount Etna (Italy). *Annals of Geophysics*. <https://doi.org/10.4401/ag-5332>
- Nicolaus Specialis (1791). Historia Sicula ab anno 1282 ad annum 1337, jam antea edita, nunc vero supplementis aucta et castigatissima prodit e Siculis manuscriptis codicibus. In "*Bibliotheca scriptorum qui res in Sicilia gestas sub Aragonum imperio retulere*", ed. R.Gregorio, tomo 1, pp.283-508, Palermo.
- Patanè, G. & Imposa, S., (1995). Atlante delle isosiste dei terremoti etnei dal 1971 al 1991. *CNR-GNGTS, Ist. Geologia e Geofisica Università di Catania* 81.
- Pinna, M., Signorelli, A., Binda, G., Dossi, C., Rampazzi, L., Spanu, D., & Recchia, S. (2022). How to Clean and Safely Remove HF from Acid Digestion Solutions for Ultra-Trace Analysis: A Microwave-Assisted Vessel-Inside-Vessel Protocol. *Methods and Protocols*, 5(2), 30. <https://doi.org/10.3390/mps5020030>
- Platania, G. (1908). Il terremoto del 7 Dicembre 1907. *Mem. Cl. Sci. R. Acc. Zelanti* 5 (3), 13-20.
- Platania, G., (1915). Sul periodo sismico del Maggio 1914 nella regione orientale dell'Etna. *Mem. Cl. Sci. R. Acc. Zelanti* 7 (3°), pp. 48.
- Platania, G., (1920). Sul periodo sismico del novembre 1919 presso Acireale. *Bollettino del R. Osservatorio Geodinamico di Catania, Nuova serie, N. 3-4*, 8.
- Platania, G., & Platania, G., (1894). Note su i terremoti etnei dell'agosto 1894. *Estr.dai Rend. dell'Acc. di Sc., Let. e Arti Zelanti di Acireale, nuova serie Vol.VI 1894*.
- Ponte, G. (1941): Bollettino vulcanologico e meteorologico dell'Etna Boll. Acc. Gioenia. Sci. Nat., s. III, 18, aprile-giugno, 35-37.
- Rasà, R., Azzaro, R. & Leonardi, O., 1996. Aseismic creep on faults and flank instability at Mount Etna volcano, Sicily. *Geological Society, London, Special Publications* 110, 179–192. <https://doi.org/10.1144/GSL.SP.1996.110.01.14>
- Recupero G., (1815). Storia naturale e generale dell'Etna. *Regia Università degli Studi, Catania*, 2 vol., 244 + 235 pp. [ristampa anastatica Dafni Ed., Catania, 1983].



- Riccò, A. (1894). Breve relazione sui terremoti del 7 ed 8 agosto 1894 avvenuti nelle contrade etnee. *Boll. Mens. Oss. Centr. Moncalieri* 14 (2/10), 145-148.
- Silvestri, O., (1979). Fenomeni dell'Etna successivi all'ultima eruzione. *Bullettino del Vulcanismo Italiano, anno VI, (8-11, agosto-novembre), 119-124.*
- Silvestri, A., (1893). L'eruzione dell'Etna del 1886. *Atti dell'Acc. Gioenia di Sc. Nat. in Catania serie IV° 6 (memoria 11).*
- Tringali, G. (2023). Earthquake surface faulting and aseismic creep on Etna volcano: role of the pre-volcanic basement, relationships with flank instability and magmatic intrusions, implications for future hazard scenarios. *Ph.D. Thesis, Università degli Studi dell'Insubria, Italy*, <https://hdl.handle.net/11383/2165092>
- Tringali, G., Bella, D., Livio, F.A., Ferrario, M.F., Groppelli, G., Blumetti, A.M., Di Manna, P., Vittori, E., Guerrieri, L., Porfido, S., Boso, D., Pettinato, R., Paradiso, G., & Michetti, A.M. (2023a). Fault rupture and aseismic creep accompanying the December 26, 2018, Mw 4.9 Fleri earthquake (Mt. Etna, Italy): Factors affecting the surface faulting in a volcano-tectonic environment. *Quaternary International*, 651, 25-41. <https://doi.org/10.1016/j.quaint.2021.12.019>
- Tringali, G., Bella, D., Livio, F., Ferrario, M. F., Groppelli, G., Pettinato, R., & Michetti, A. M. (2023b). Aseismic creep and gravitational sliding on the lower eastern flank of Mt. Etna: Insights from the 2002 and 2022 fault rupture events between Santa Venerina and Santa Tecla. *Tectonophysics*, 856, 229829. <https://doi.org/10.1016/j.tecto.2023.229829>
- USEPA, "EPA Method 3051: Microwave Assisted Acid Digestion of Sediments, Sludges, Soils and Oils," 3rd Edition, Test Methods for Evaluating Solid Waste, Washington, DC., 1995a.
- Villari, L. (1984). Piano di recupero della frazione di Fleri, Relazione Geologica, RIF. 24287/LV.
