# Supplementary material for: Unveiling Etna volcano flank dynamics from new paleoseismological findings along the Fiandaca Fault
Source: Copernicus journal article supplement (doi:10.5194/egusphere-2024-4078), 2025-01-22
Supplement: Supplementary file [file egusphere-2024-4078-AC1-supplement.pdf]

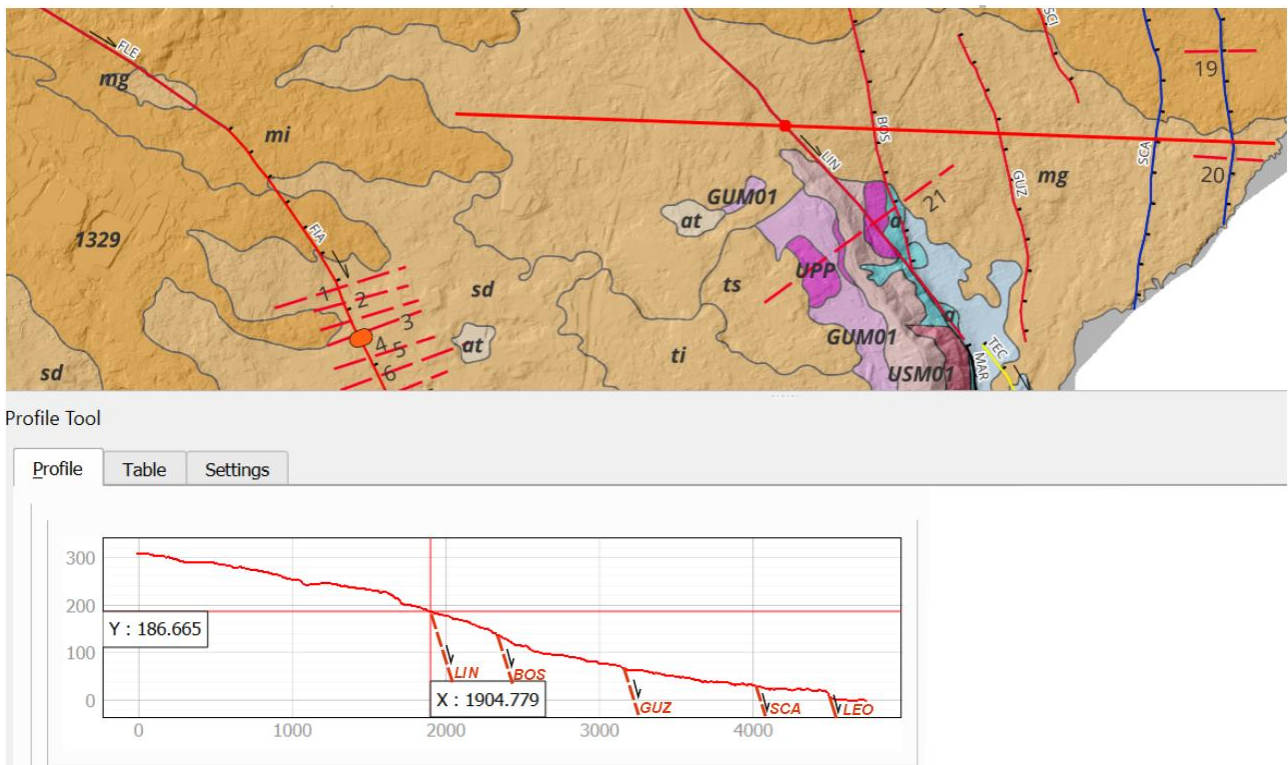

Figure 1: Profile along the mg lava flow crosscutting several faults, the “mg” lava flow partially covered the Linera fault scarp producing an increase in the slope angle without resetting the surface morphology.



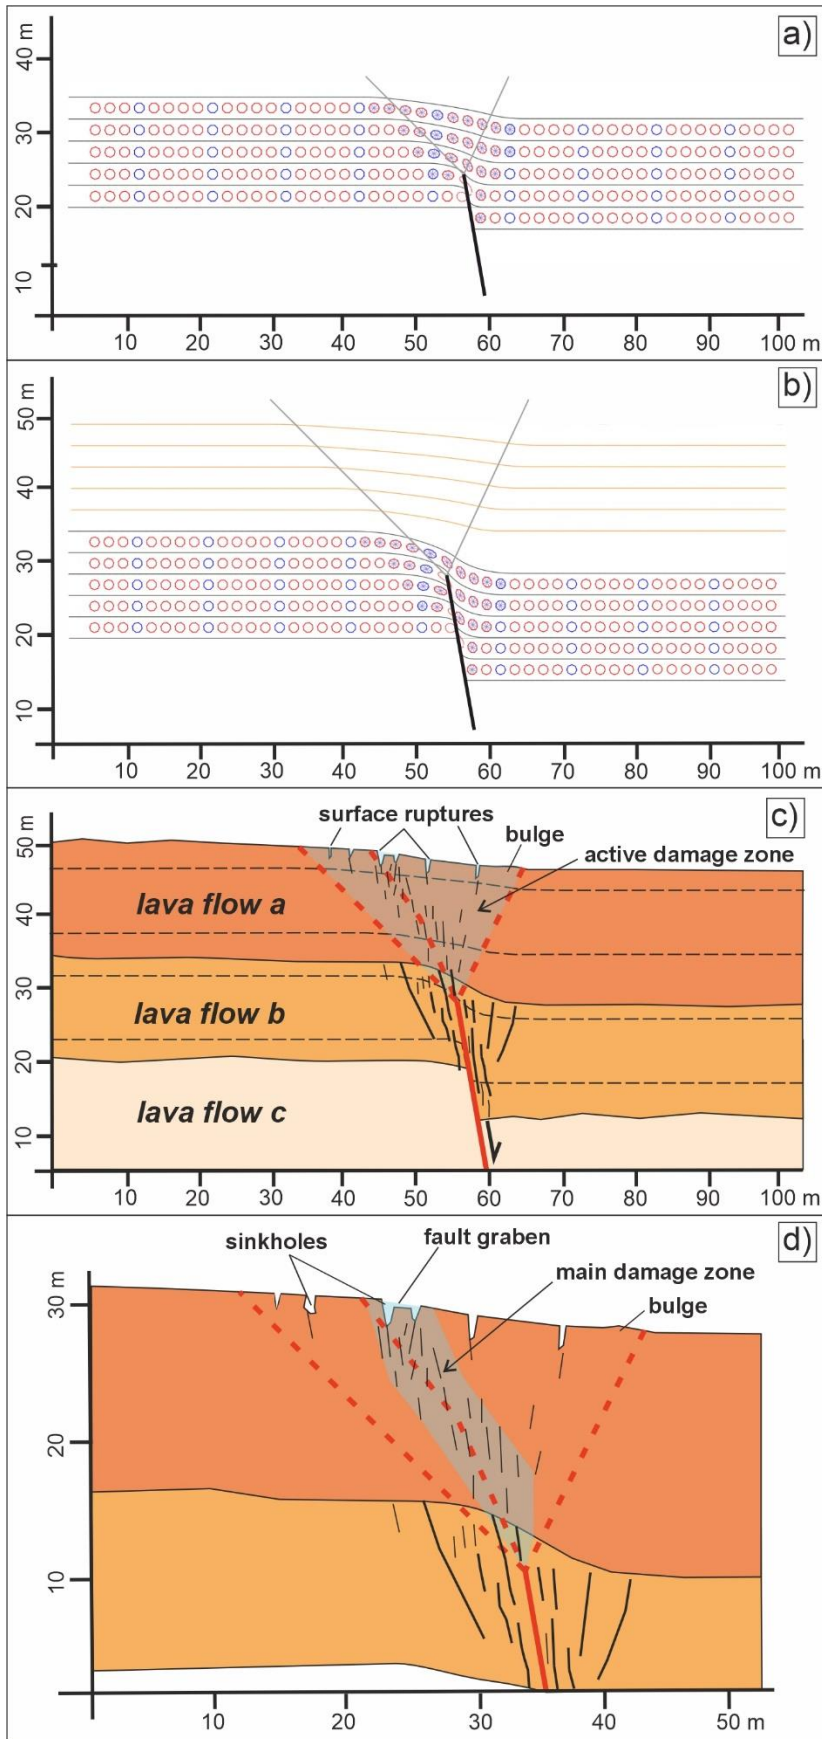

Figure 3: a and b) trishear deformation zone model obtained with FaultFold Forward software; c and d) the trishear model applied to the Fiandaca fault.
